# Supplementary material
Source: publisher figshare collection journal article supplement (https://tandf.figshare.com/ndownloader/files/14209304)

**Supporting Information**

**One-Pot Four-Component Domino Reaction for the Synthesis of Bifunctionalized Spiro[indazolo[3,2-*b*]quinazoline-7,3'-indoline Hybrids: A Green Approach**

Sandip Gangadhar Balwe, Kwon Taek Lim, Byung Gwon Cho, Yeon Tae Jeong*

*Department of Image Science and Engineering, Pukyong National University, Busan 608-737, Republic of Korea, Corresponding author: Tel.: +82-51-629-6411; fax: +82-51-629- 6408*

**Table of Contents**

1. General Information…………………………………………………………….. **S2**

2. Experimental procedure…………………………………………………………..**S2**

3. Characterization Data of the compounds………………………………………....**S3-S9**

4. 1H NMR, 13C NMR, IR and HRMS spectra of the compounds………………….**S10-S29**

**General Information**

Chemicals were purchased from Aldrich and Alfa Aesar Chemical Companies and used without further purification. NMR spectra were recorded in parts per million (ppm) in CDCl3 or DMSO-*d6*on a Jeol JNM ECP 600 NMR instrument using TMS as internal standard. Standard abbreviations were used to denote signal multiplicities (s = singlet, d = doublet, t = triplet, q = quartet, m = multiplet). Mass spectra were recorded on a Jeol JMS-700 mass spectrometer. All melting points were determined using open capillaries on an Electrothermal-9100 (Japan) instrument and are uncorrected.

**Experimental procedure**

**General procedure for the synthesis of the Synthesis of spiro[indazolo[3,2-*b*]quinazoline-7,3'-indolines (5).**

To an oven dried round bottom flask charged with a mixture of 2-fluorobenzonitrile (**1a**, 1 mmol) and hydrazine (**2a**, 1mmol) in ethanol (3 ml), stirred the reaction mixture at 80 °C, for 30 min. To the reaction mixture isatin (**3a**, 1 mmol), 5,5-dimethyl-1,3-cyclohexanedione (**4a**, 1 mmol) and *p*-TSA (40 mol %) was added and the reaction mixture was further stirred at 80 ºC for 4 h. The progress of the reaction was monitored by TLC. After completion of the reaction, solid products was filtered under vacuum, air dried, to obtain the analytically pure products. The compounds **5a-5r** were also synthesized by adopting this procedure.

**Characterization Data of the compounds**

**10,10-dimethyl-10,11-dihydro-5*H*-spiro[indazolo[3,2-*b*]quinazoline-7,3'-indoline]-2',8(9*H*)-dione** (**5a):** Yield: 96 % (368.7 mg); off White solid; Mp: >300 oC; 1H NMR (600 MHz, DMSO-*d6*) δ 11.36 (s, 1H), 10.57 (s, 1H), 7.78 (d, *J* = 8.5 Hz, 1H), 7.30 (d, *J* = 8.9 Hz, 1H), 7.21 – 7.14 (m, 2H), 6.98 – 6.92 (m, 1H), 6.89 (d, *J* = 7.2 Hz, 1H), 6.85 (d, *J* = 7.7 Hz, 1H), 6.81 – 6.76 (m, 1H), 2.78 – 2.62 (m, 2H), 2.23 – 2.06 (m, 2H), 1.10 (s, 3H), 1.06 (s, 3H).; 13C NMR (150 MHz, DMSO-*d6*) δ 192.62, 175.44, 150.31, 147.97, 143.38, 132.85, 130.55, 129.65, 127.59, 123.28, 122.02, 120.14, 120.11, 116.93, 109.99, 107.40, 103.74, 66.77, 50.49, 32.96, 28.66, 27.43.; IR: 3337, 3154, 3041, 2960, 1703, 1644, 1601, 1568, 1335, 742 cm1; HRMS (ESI, m/z): calcd for C23H20N4O2 (M+Na) 407.1478, found: 407.1479.

**5'-methoxy-10,10-dimethyl-10,11-dihydro-5*H*-spiro[indazolo[3,2-*b*]quinazoline-7,3'-indoline]-2',8(9*H*)-dione (5b):** Yield: 94 % (389.4 mg); White solid; Mp: >300 oC; 1H NMR (600 MHz, DMSO-*d6*) δ 11.31 (s, 1H), 10.36 (s, 1H), 7.78 (d, *J* = 8.4 Hz, 1H), 7.31 (d, *J* = 8.8 Hz, 1H), 7.22 – 7.15 (m, 1H), 6.97 – 6.92 (m, 1H), 6.78 – 6.73 (m, 2H), 6.51 (s, 1H), 3.56 (s, 3H), 2.76 – 2.64 (m, 2H), 2.23 – 2.08 (m, 2H), 1.10 (s, 3H), 1.08 (s, 3H).; 13C NMR (150 MHz, DMSO-*d6*) δ 192.14, 174.88, 154.86, 149.80, 147.48, 136.29, 133.50, 130.02, 127.10, 119.67, 119.64, 116.44, 113.42, 110.01, 109.78, 106.92, 103.19, 66.66, 55.33, 49.99, 32.47, 28.15, 26.94.; IR: 3319, 3154, 2951, 1705, 1644, 1604, 1570, 1337, 1268, 737 cm1; HRMS (ESI, m/z): calcd for C24H22N4O3 (M+Na) 437.1584, found: 437.1588.

**5',10,10-trimethyl-10,11-dihydro-5*H*-spiro[indazolo[3,2-*b*]quinazoline-7,3'-indoline]-2',8(9*H*)-dione (5c):** Yield: 95 % (374.5 mg); White solid; Mp: >300 oC; 1H NMR (600 MHz, DMSO-*d6*) δ 11.31 (s, 1H), 10.43 (s, 1H), 7.78 (d, *J* = 8.5 Hz, 1H), 7.30 (d, *J* = 8.8 Hz, 1H), 7.20 – 7.16 (m, 1H), 6.99 – 6.92 (m, 2H), 6.74 (d, *J* = 7.9 Hz, 1H), 6.69 (s, 1H), 2.75 – 2.65 (m, 2H), 2.22 – 2.10 (m, 2H), 2.09 (s, 3H), 1.10 (s, 3H), 1.08 (s, 3H).; 13C NMR (150 MHz, DMSO-*d6*) δ 192.13, 174.94, 149.74, 147.42, 140.45, 132.45, 130.39, 130.01, 129.37, 127.08, 123.35, 119.62, 116.43, 109.24, 106.90, 103.27, 66.37, 49.99, 32.50, 28.01, 27.13, 20.53.; HRMS (ESI, m/z): calcd for C24H22N4O2 (M+H+) 398.1743, found: 398.1741.

**5'-fluoro-10,10-dimethyl-10,11-dihydro-5*H*-spiro[indazolo[3,2-*b*]quinazoline-7,3'-indoline]-2',8(9*H*)-dione (5d):** Yield: 85 % (341.8 mg); Off White solid; Mp: >300 oC; 1H NMR (600 MHz, DMSO-*d6*) δ 11.40 (s, 1H), 10.57 (s, 1H), 7.79 (d, *J* = 8.5 Hz, 1H), 7.32 (d, *J* = 8.9 Hz, 1H), 7.22 – 7.18 (m, 1H), 7.03 – 6.99 (m, 1H), 6.98 – 6.94 (m, 1H), 6.88 – 6.83 (m, 2H), 2.75 – 2.64 (m, 2H), 2.23 – 2.09 (m, 2H), 1.10 (s, 3H), 1.08 (s, 3H).; 13C NMR (150 MHz, DMSO-*d6*) δ 192.27, 175.09, 158.87, 157.30, 150.13, 147.60, 139.22, 133.75, 133.70, 130.10, 127.25, 119.78, 119.69, 116.45, 115.43, 115.28, 110.94, 110.77, 110.17, 110.11, 106.95, 102.82, 66.50, 49.93, 32.50, 27.97, 27.21.; HRMS (ESI, m/z): calcd for C23H19FN4O2 (M+H+) 402.1492, found: 402.1495.

**5'-chloro-10,10-dimethyl-10,11-dihydro-5*H*-spiro[indazolo[3,2-*b*]quinazoline-7,3'-indoline]-2',8(9*H*)-dione (5e):** Yield: 87 % (364.4 mg); Off White solid; Mp: >300 oC; 1H NMR (600 MHz, DMSO-*d6*) δ 11.42 (s, 1H), 10.70 (s, 1H), 7.80 (d, *J* = 8.5 Hz, 1H), 7.32 (d, *J* = 8.8 Hz, 1H), 7.25 – 7.18 (m, 2H), 7.01 (d, *J* = 2.1 Hz, 1H), 6.98 – 6.94 (m, 1H), 6.88 (d, *J* = 8.3 Hz, 1H), 2.74 – 2.67 (m, 2H), 2.23 – 2.11 (m, 2H), 1.09 (s, 3H), 1.08 (s, 3H).; 13C NMR (150 MHz, DMSO-*d6*) δ 192.25, 174.76, 150.18, 147.59, 141.90, 134.09, 130.09, 128.99, 127.22, 125.47, 122.99, 119.74, 119.65, 116.39, 110.86, 106.93, 102.68, 66.22, 49.88, 32.46, 27.70, 27.36.; HRMS (ESI, m/z): calcd for C23H19ClN4O2 (M+H+) 418.1197, found: 418.1194.

**2-bromo-10,10-dimethyl-10,11-dihydro-5*H*-spiro[indazolo[3,2-*b*]quinazoline-7,3'-indoline]-2',8(9*H*)-dione (5f):** Yield: 84 % (388.2 mg); Off White solid; Mp: >300 oC; 1H NMR (600 MHz, DMSO-*d6*) δ 11.34 (s, 1H), 10.61 (s, 1H), 8.02 (d, *J* = 1.7 Hz, 1H), 7.34 – 7.25 (m, 2H), 7.18 (td, *J* = 7.7, 1.1 Hz, 1H), 6.91 (d, *J* = 7.3 Hz, 1H), 6.85 (d, *J* = 7.7 Hz, 1H), 6.82 – 6.77 (m, 1H), 2.77 – 2.60 (m, 2H), 2.25 – 2.05 (m, 2H), 1.10 (s, 3H), 1.06 (s, 3H).; 13C NMR (150 MHz, DMSO-*d6*) δ 192.25, 174.72, 149.73, 145.83, 142.82, 132.09, 130.22, 129.92, 129.34, 122.88, 121.85, 121.64, 118.91, 111.52, 109.58, 108.03, 103.35, 66.40, 49.93, 32.49, 28.14, 26.87.; HRMS (ESI, m/z): calcd for C23H19BrN4O2 (M+H+) 462.0691, found: 462.0694.

**2-bromo-5'-methoxy-10,10-dimethyl-10,11-dihydro-5*H*-spiro[indazolo[3,2-*b*]quinazoline-7,3'-indoline]-2',8(9*H*)-dione (5g):** Yield: 86 % (423.0 mg); Off white solid; Mp: >300 oC; 1H NMR (600 MHz, DMSO-*d6*) δ 11.32 (s, 1H), 10.42 (s, 1H), 8.02 (s, 1H), 7.32 (d, *J* = 9.2 Hz, 1H), 7.27 (dd, *J* = 9.2, 1.9 Hz, 1H), 6.79 – 6.74 (m, 2H), 6.53 (s, 1H), 3.56 (s, 3H), 2.77 – 2.60 (m, 2H), 2.22 – 2.08 (m, 2H), 1.10 (s, 3H), 1.07 (s, 3H); 13C NMR (150 MHz, DMSO-*d6*) δ 192.23, 174.63, 154.90, 149.69, 145.83, 136.22, 133.24, 130.19, 129.90, 121.88, 118.92, 113.57, 111.48, 110.10, 109.86, 108.04, 103.33, 66.78, 55.34, 49.97, 32.49, 28.11, 26.92.; HRMS (ESI, m/z): calcd for C24H21BrN4O3 (M+H+) 492.0797, found: 492.0795.

**1-fluoro-10,10-dimethyl-10,11-dihydro-5*H*-spiro[indazolo[3,2-*b*]quinazoline-7,3'-indoline]-2',8(9*H*)-dione (5h):** Yield: 94 % (378.0 mg); White solid; Mp: >300 oC; 1H NMR (600 MHz, DMSO-*d6*) δ 11.03 (s, 1H), 10.63 (s, 1H), 7.20 – 7.12 (m, 3H), 6.94 (d, *J* = 7.2 Hz, 1H), 6.86 (d, *J* = 7.8 Hz, 1H), 6.80 (t, *J* = 7.5 Hz, 1H), 6.70 – 6.66 (m, 1H), 2.83 – 2.72 (m, 2H), 2.26 – 2.03 (m, 2H), 1.08 (s, 3H), 1.04 (s, 3H); 13C NMR (150 MHz, DMSO-*d6*) δ 192.55, 174.74, 155.79, 154.12, 150.57, 149.61, 149.57, 142.84, 132.07, 129.40, 128.95, 128.92, 127.57, 127.52, 122.93, 121.69, 112.92, 112.88, 109.61, 103.74, 102.75, 102.63, 98.08, 97.95, 66.29, 49.89, 32.41, 28.25, 26.90.; HRMS (ESI, m/z): calcd for C23H19FN4O2 (M+H+) 402.1492, found: 402.1495.

**1-fluoro-5'-methoxy-10,10-dimethyl-10,11-dihydro-5*H*-spiro[indazolo[3,2-*b*]quinazoline-7,3'-indoline]-2',8(9*H*)-dione (5i):** Yield: 92 % (397.5 mg); Off White solid; Mp: >300 oC; 1H NMR (600 MHz, DMSO-*d6*) δ 11.01 (s, 1H), 10.44 (s, 1H), 7.17 – 7.13 (m, 2H), 6.79 – 6.74 (m, 2H), 6.70 – 6.66 (m, 1H), 6.57 (d, *J* = 2.2 Hz, 1H), 3.57 (s, 3H), 2.80 – 2.72 (m, 2H), 2.23 – 2.08 (m, 2H), 1.08 (s, 3H), 1.05 (s, 3H); 13C NMR (150 MHz, DMSO-*d6*) δ 192.53, 174.67, 155.83, 154.94, 154.16, 150.53, 149.61, 149.57, 136.24, 133.20, 128.95, 128.92, 127.54, 127.49, 113.67, 112.92, 112.89, 110.10, 109.91, 103.72, 102.70, 102.59, 98.09, 97.97, 66.69, 55.35, 49.93, 32.41, 28.21, 26.95.; HRMS (ESI, m/z): calcd for C24H21FN4O3 (M+H+) 432.1598, found: 432.1595.

**5'-chloro-1-fluoro-10,10-dimethyl-10,11-dihydro-5*H*-spiro[indazolo[3,2-*b*]quinazoline-7,3'-indoline]-2',8(9*H*)-dione (5j):** Yield: 88 % (383.7 mg); Off White solid; Mp: >300 oC; 1H NMR (600 MHz, DMSO-*d6*) δ 11.11 (s, 1H), 10.78 (s, 1H), 7.25 (dd, *J* = 8.3, 2.2 Hz, 1H), 7.19 – 7.14 (m, 2H), 7.09 (d, *J* = 2.2 Hz, 1H), 6.88 (d, *J* = 8.3 Hz, 1H), 6.71 – 6.67 (m, 1H), 2.81 – 2.73 (m, 2H), 2.22 – 2.12 (m, 2H), 1.07 (s, 3H), 1.06 (s, 3H); 13C NMR (150 MHz, DMSO-*d6*) δ 192.73, 174.64, 155.83, 154.16, 151.01, 149.72, 149.69, 141.91, 133.84, 129.26, 129.09, 129.06, 127.73, 127.68, 125.65, 123.29, 112.90, 112.87, 111.01, 103.23, 102.85, 102.73, 98.19, 98.06, 66.28, 49.84, 32.47, 27.82, 27.41.; HRMS (ESI, m/z): calcd for C23H18ClFN4O2 (M+H+) 436.1102, found: 436.1105.

**1,5'-difluoro-10,10-dimethyl-10,11-dihydro-5*H*-spiro[indazolo[3,2-*b*]quinazoline-7,3'-indoline]-2',8(9*H*)-dione (5k):** Yield: 90 % (378.2 mg); Pale yellow solid; Mp: >300 oC; 1H NMR (600 MHz, DMSO-*d6*) δ 11.09 (s, 1H), 10.65 (s, 1H), 7.19 – 7.14 (m, 2H), 7.05 – 7.00 (m, 1H), 6.95 (dd, *J* = 7.9, 2.6 Hz, 1H), 6.87 – 6.83 (m, 1H), 6.71 – 6.67 (m, 1H), 2.80 – 2.73 (m, 2H), 2.23 – 2.09 (m, 2H), 1.08 (s, 3H), 1.06 (s, 3H); 13C NMR (150 MHz, DMSO-*d6*) δ 192.60, 174.83, 158.88, 157.31, 155.80, 154.13, 150.83, 149.68, 149.65, 139.19, 139.18, 133.42, 133.37, 129.03, 129.00, 127.64, 127.59, 115.61, 115.46, 112.89, 112.86, 111.09, 110.92, 110.24, 110.19, 103.35, 102.77, 102.65, 98.13, 98.00, 66.50, 49.86, 32.38, 27.97, 27.20.; HRMS (ESI, m/z): calcd for C23H18F2N4O2 (M+H+) 420.1398, found: 420.1396.

**1-fluoro-5',10,10-trimethyl-10,11-dihydro-5*H*-spiro[indazolo[3,2-*b*]quinazoline-7,3'-indoline]-2',8(9*H*)-dione (5l):** Yield: 87 % (362.2 mg); Off white solid; Mp: >300 oC; 1H NMR (600 MHz, DMSO-*d6*) δ 10.99 (s, 1H), 10.50 (s, 1H), 7.18 – 7.12 (m, 2H), 7.00 – 6.97 (m, 1H), 6.75 (d, *J* = 8.0 Hz, 2H), 6.70 – 6.65 (m, 1H), 2.80 – 2.74 (m, 2H), 2.23 – 2.11 (m, 2H), 2.10 (s, 3H), 1.08 (s, 3H), 1.06 (s, 3H); 13C NMR (150 MHz, DMSO-*d6*) δ 192.46, 174.66, 155.78, 154.10, 150.42, 149.54, 149.50, 140.41, 132.12, 130.51, 129.55, 128.90, 128.87, 127.47, 127.41, 123.41, 112.87, 112.84, 109.31, 103.80, 102.64, 102.53, 98.04, 97.92, 66.38, 49.92, 32.38, 28.00, 27.12, 20.50; HRMS (ESI, m/z): calcd for C24H21FN4O2 (M+H+) 416.1649, found: 416.1646.

**4-fluoro-10,10-dimethyl-10,11-dihydro-5*H*-spiro[indazolo[3,2-*b*]quinazoline-7,3'-indoline]-2',8(9*H*)-dione (5m):** Yield: 84 % (338.0 mg); White solid; Mp: >300 oC; 1H NMR (600 MHz, DMSO-*d6*) δ 11.40 (s, 1H), 10.57 (s, 1H), 7.86 – 7.81 (m, 1H), 7.20 – 7.14 (m, 1H), 7.09 – 7.05 (m, 1H), 6.91 (d, *J* = 7.2 Hz, 1H), 6.88 – 6.83 (m, 2H), 6.82 – 6.77 (m, 1H), 2.77 – 2.62 (m, 2H), 2.24 – 2.06 (m, 2H), 1.10 (s, 3H), 1.06 (s, 3H); 13C NMR (150 MHz, DMSO-*d6*) δ 192.22, 174.77, 162.64, 161.04, 149.81, 147.35, 147.26, 142.84, 132.08, 130.78, 129.24, 122.85, 122.22, 122.14, 121.56, 110.91, 110.72, 109.51, 104.44, 103.42, 99.61, 99.45, 66.24, 49.93, 32.46, 28.11, 26.89.; HRMS (ESI, m/z): calcd for C23H19FN4O2 (M+H+) 402.1492, found: 402.1495.

**1',10,10-trimethyl-10,11-dihydro-5*H*-spiro[indazolo[3,2-*b*]quinazoline-7,3'-indoline]-2',8(9*H*)-dione (5n):** Yield: 93 % (370.6 mg); White solid; Mp: >300 oC; 1H NMR (600 MHz, DMSO-*d6*) δ 11.40 (s, 1H), 7.79 (d, J = 8.5 Hz, 1H), 7.32 – 7.25 (m, 2H), 7.20 – 7.15 (m, 1H), 7.05 (d, *J* = 7.8 Hz, 1H), 6.97 – 6.93 (m, 2H), 6.90 – 6.85 (m, 1H), 3.23 (s, 3H), 2.78 – 2.63 (m, 2H), 2.21 – 2.03 (m, 2H), 1.10 (s, 3H), 1.06 (s, 3H); 13C NMR (150 MHz, DMSO-*d6*) δ 192.11, 173.68, 149.88, 147.50, 144.23, 131.54, 130.17, 129.36, 127.18, 122.47, 122.28, 119.73, 119.62, 116.45, 108.33, 106.92, 103.22, 65.83, 49.89, 32.49, 28.06, 26.96, 26.55; HRMS (ESI, m/z): calcd for C24H22N4O2 (M+H+) 398.1743, found: 398.1747.

**1-fluoro-1',10,10-trimethyl-10,11-dihydro-5*H*-spiro[indazolo[3,2-*b*]quinazoline-7,3'-indoline]-2',8(9*H*)-dione (5o):** Yield: 95 % (395.6 mg); White solid; Mp: >300 oC; 1H NMR (600 MHz, DMSO-*d6*) δ 11.09 (s, 1H), 7.31 – 7.27 (m, 1H), 7.16 – 7.13 (m, 2H), 7.06 (d, 1H), 7.00 (d, *J* = 7.4 Hz, 1H), 6.89 (t, *J* = 7.5 Hz, 1H), 6.71 – 6.67 (m, 1H), 3.23 (s, 3H), 2.82 – 2.74 (m, 2H), 2.24 – 2.02 (m, 2H), 1.08 (s, 3H), 1.03 (s, 3H); 13C NMR (150 MHz, DMSO-*d6*) δ 192.45, 173.41, 155.74, 154.06, 150.58, 149.60, 149.56, 144.19, 131.23, 129.53, 129.08, 129.05, 127.57, 127.52, 122.57, 122.37, 112.89, 112.86, 108.40, 103.74, 102.75, 102.64, 98.09, 97.97, 65.83, 49.82, 32.38, 28.07, 26.94, 26.57; HRMS (ESI, m/z): calcd for C24H21FN4O2 (M+H+) 416.1649, found: 416.1652.

**2-bromo-1',10,10-trimethyl-10,11-dihydro-5*H*-spiro[indazolo[3,2-*b*]quinazoline-7,3'-indoline]-2',8(9*H*)-dione (5p):** Yield: 89 % (424.8 mg); White solid; Mp: >300 oC; 1H NMR (600 MHz, DMSO-*d6*) δ 11.40 (s, 1H), 8.03 (s, 1H), 7.33 – 7.24 (m, 3H), 7.06 (d, *J* = 7.8 Hz, 1H), 6.96 (d, *J* = 7.3 Hz, 1H), 6.88 (t, *J* = 7.5 Hz, 1H), 3.22 (s, 3H), 2.76 – 2.61 (m, 2H), 2.22 – 2.03 (m, 2H), 1.09 (s, 3H), 1.05 (s, 3H); 13C NMR (150 MHz, DMSO-*d6*) δ 192.19, 173.41, 149.77, 145.85, 144.17, 131.28, 130.26, 130.04, 129.50, 122.54, 122.35, 121.83, 118.90, 111.57, 108.39, 108.03, 103.35, 65.94, 49.86, 32.49, 28.00, 26.91, 26.56.; HRMS (ESI, m/z): calcd for C24H21BrN4O2 (M+H+) 476.0848, found: 476.0845.

**5-methoxy-7',7'-dimethyl-7',8'-dihydro-6'*H*-spiro[indoline-3,10'- pyrido[2',3':3,4]pyrazolo[5,1-*b*]quinazoline]-2,9'(12'*H*)-dione (5q):** Yield: 85 % (349 mg); Yellow solid; Mp: >300 oC; 1H NMR (600 MHz, DMSO-*d6*) δ 11.66 (s, 1H), 10.44 (s, 1H), 8.53 – 8.49 (m, 1H), 8.29 – 8.25 (m, 1H), 7.00 – 6.96 (m, 1H), 6.82 – 6.74 (m, 2H), 6.56 (d, *J* = 2.3 Hz, 1H), 3.57 (s, 3H), 2.80 – 2.63 (m, 2H), 2.24 – 2.08 (m, 2H), 1.10 (s, 3H), 1.07 (s, 3H); 13C NMR (150 MHz, DMSO-*d6*) δ 192.36, 174.66, 156.54, 154.95, 152.67, 149.85, 136.30, 133.25, 130.05, 129.83, 115.84, 113.70, 110.17, 109.87, 103.47, 99.69, 66.68, 55.39, 49.99, 32.48, 28.11, 26.97.; HRMS (ESI, m/z): calcd for C23H21N5O3 (M+H+) 415.1644, found: 415.1647.

**Spiro[indeno[1',2':4,5]pyrimido[1,2-*b*]indazole-7,3'-indoline]-2',8(5*H*)-dione (5r):** Yield: 86 % (335.7 mg); Orange solid; Mp: >300 oC; 1H NMR (600 MHz, DMSO-*d6*) 1H NMR (600 MHz, DMSO-D6) δ 12.64 (s, 1H), 10.82 (s, 1H), 7.94 (d, *J* = 8.5 Hz, 1H), 7.80 (d, *J* = 7.3 Hz, 1H), 7.60 (t, *J* = 7.5 Hz, 1H), 7.46 (t, *J* = 7.4 Hz, 1H), 7.39 (d, *J* = 8.8 Hz, 1H), 7.34 (d, *J* = 7.1 Hz, 1H), 7.31 – 7.24 (m, 2H), 7.13 – 7.06 (m, 2H), 6.97 (d, *J* = 7.8 Hz, 1H), 6.88 (t, *J* = 7.4 Hz, 1H).; 13C NMR (150 MHz, DMSO-*d6*) δ 187.70, 174.65, 153.57, 148.59, 142.83, 135.70, 134.50, 132.66, 131.65, 131.60, 131.15, 130.53, 127.93, 124.92, 122.74, 121.49, 121.29, 120.71, 120.09, 117.43, 110.68, 108.78, 100.80, 79.70, 66.91.; HRMS (ESI, m/z): calcd for C24H14N4O2 (M+H+) 390.1117, found: 390.1121.

**1H NMR and 13C NMR of compound (5a)**
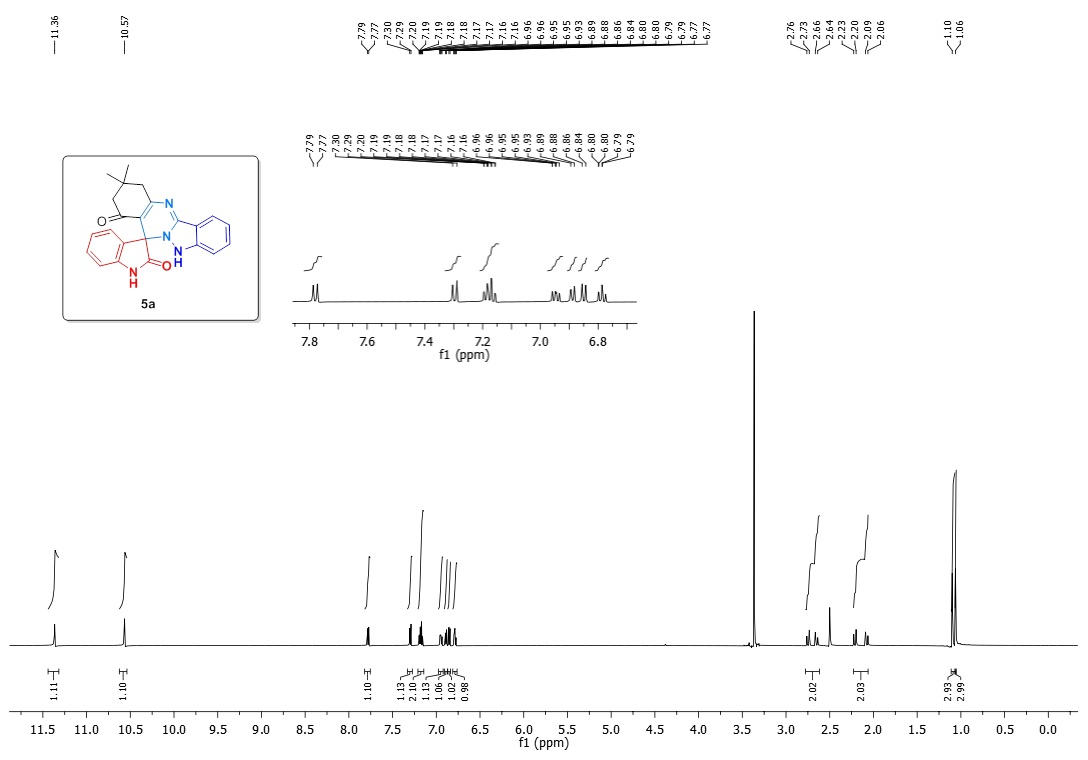

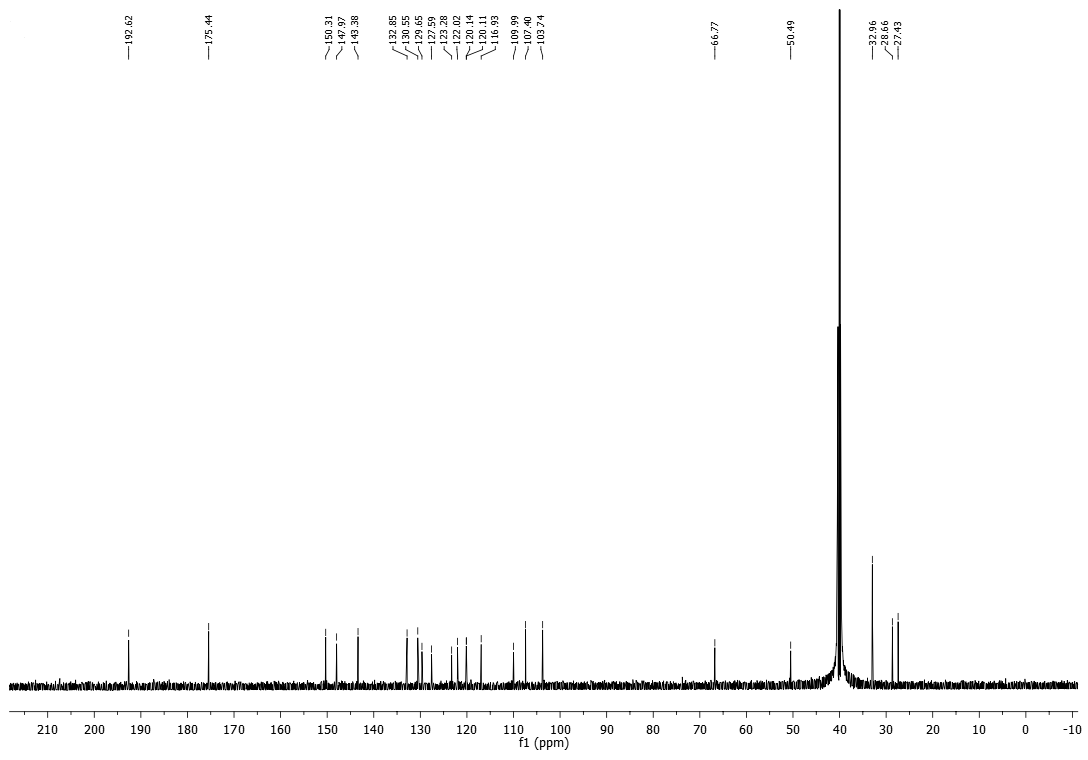


**IR and HRMS Spectra of compound (5a)**


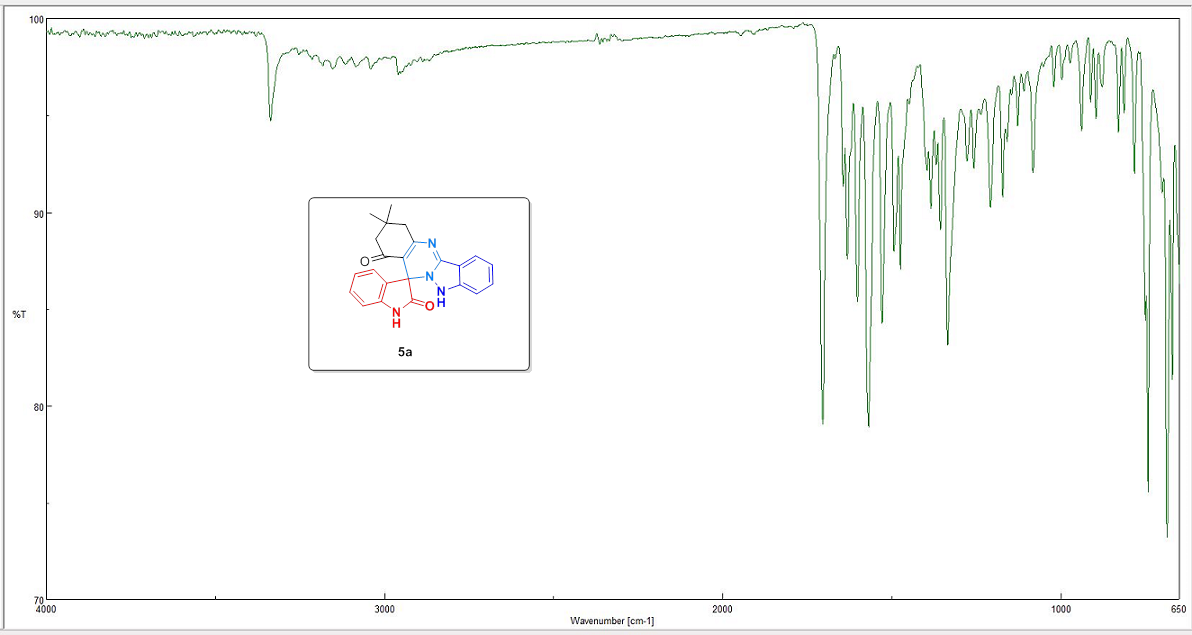


1H NMR and 13C NMR of compound (**5b**)


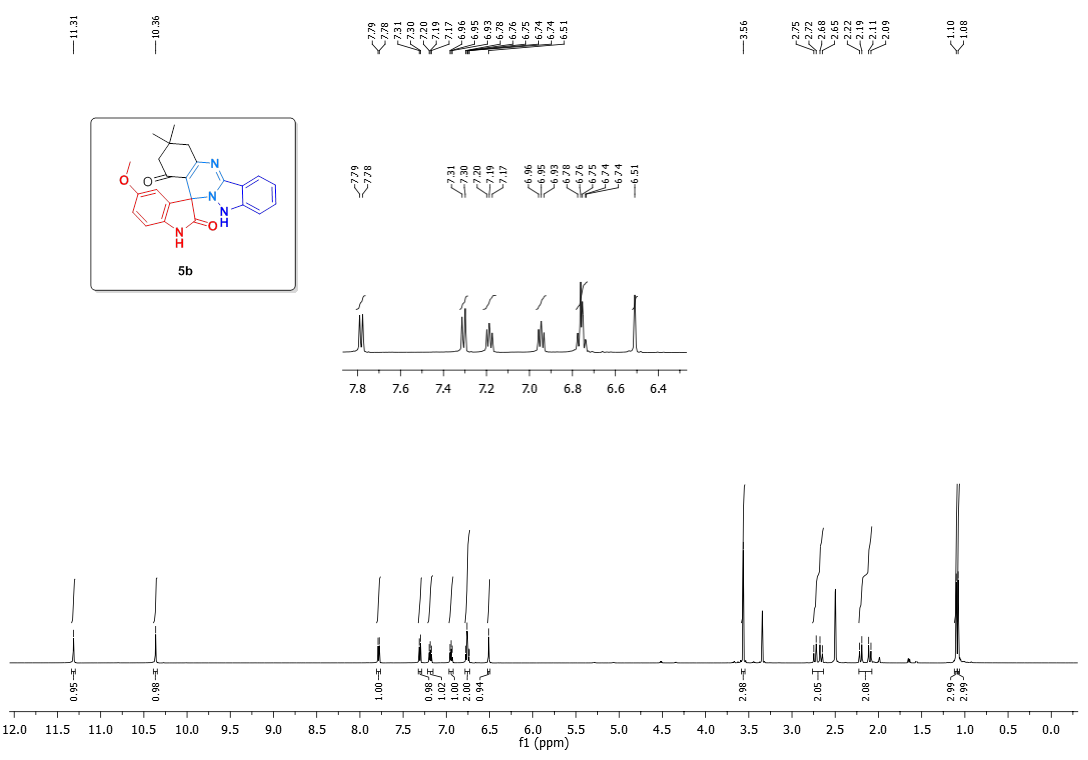

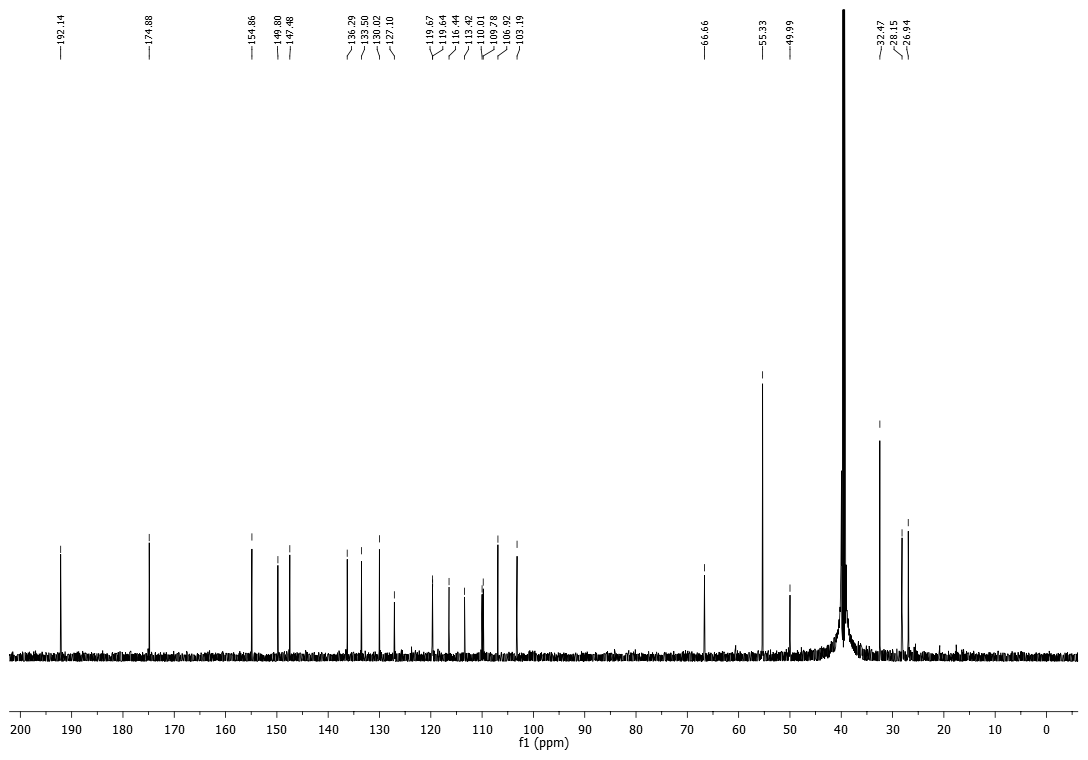


**IR and HRMS spectra of compound (5b)**


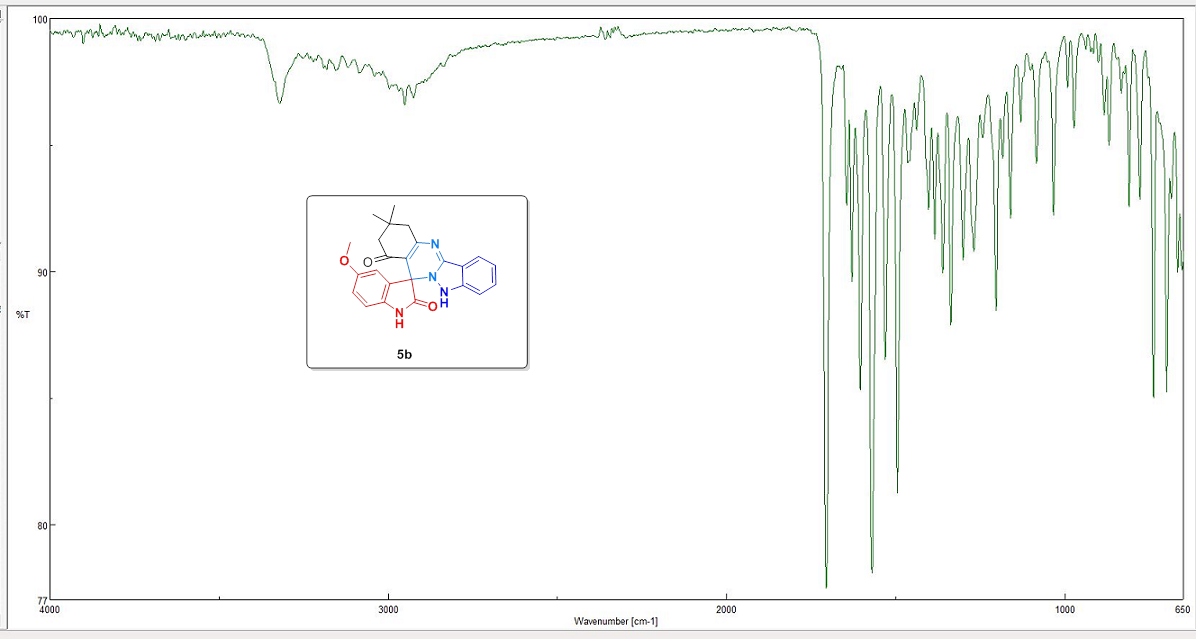


1H NMR and 13C NMR of compound (**5c**)


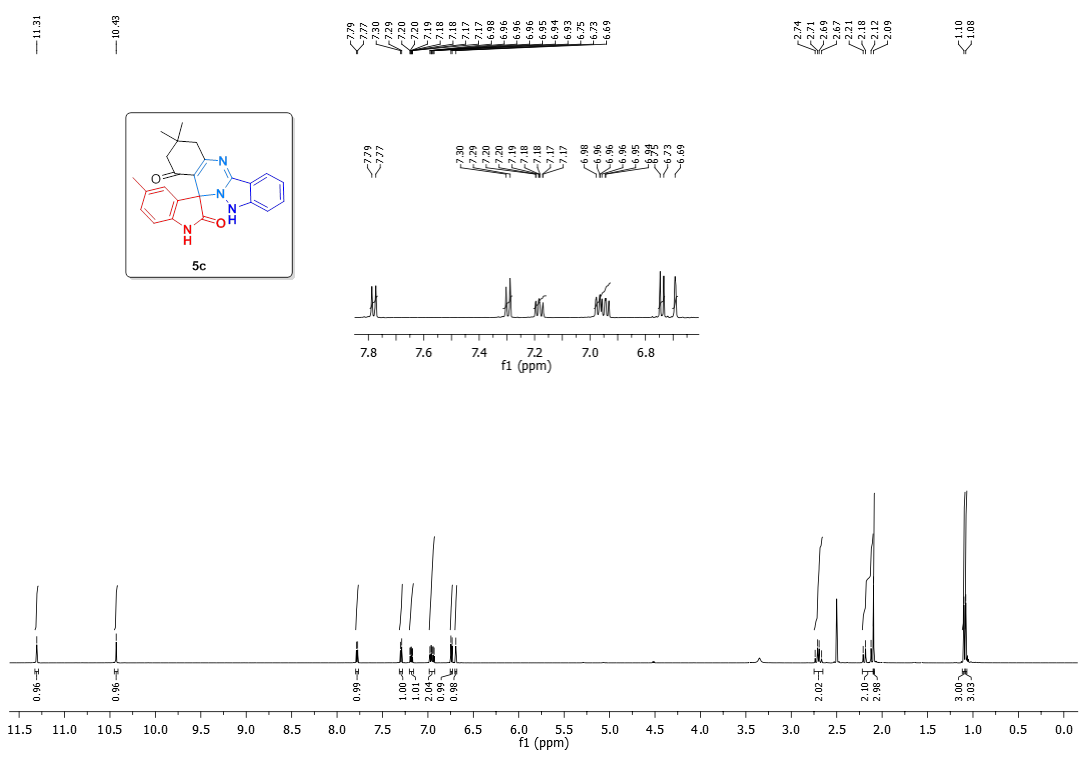

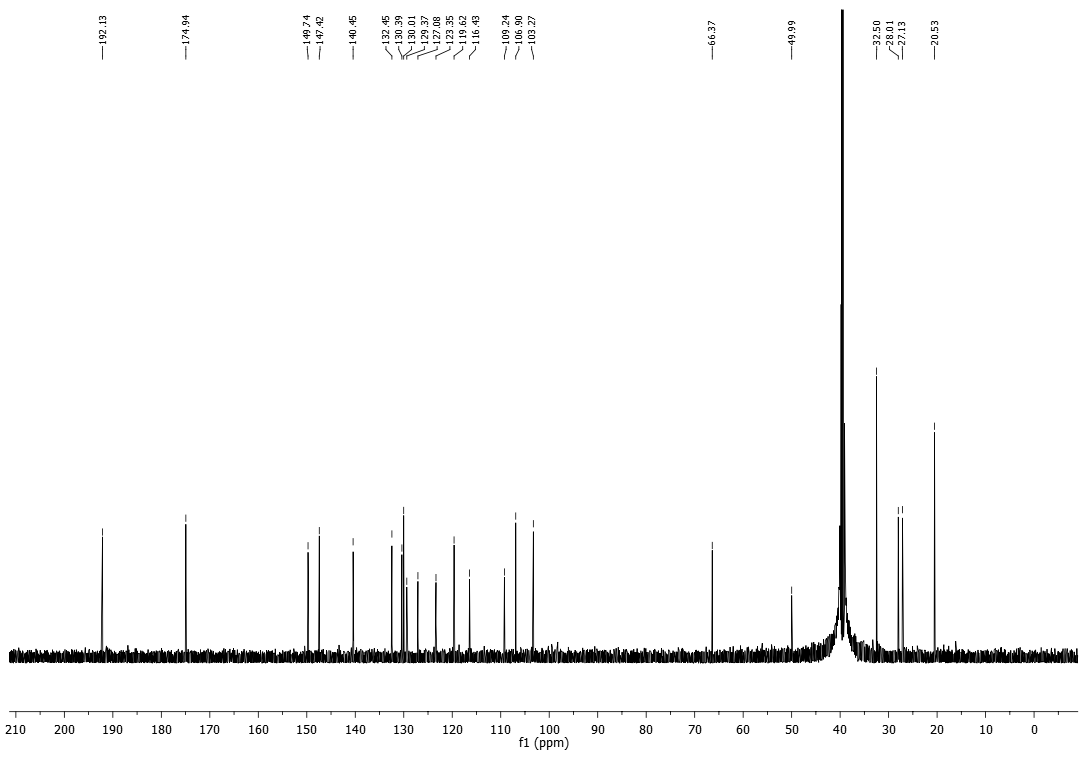


1H NMR and 13C NMR of compound (**5d**)


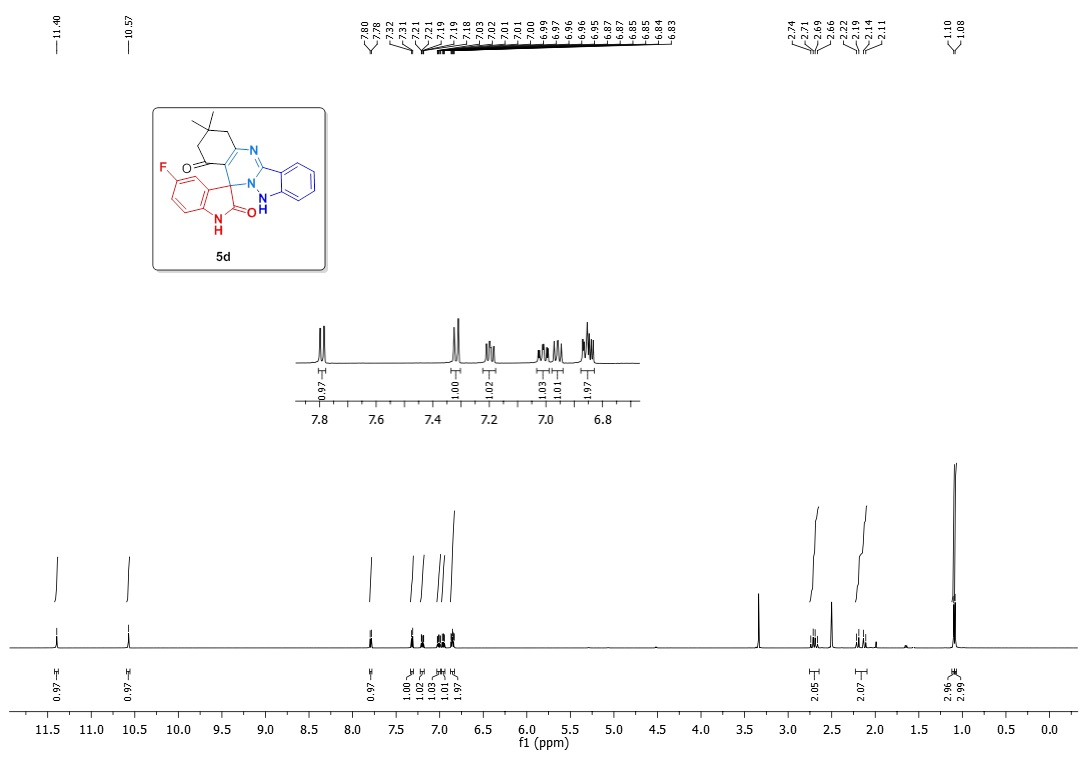

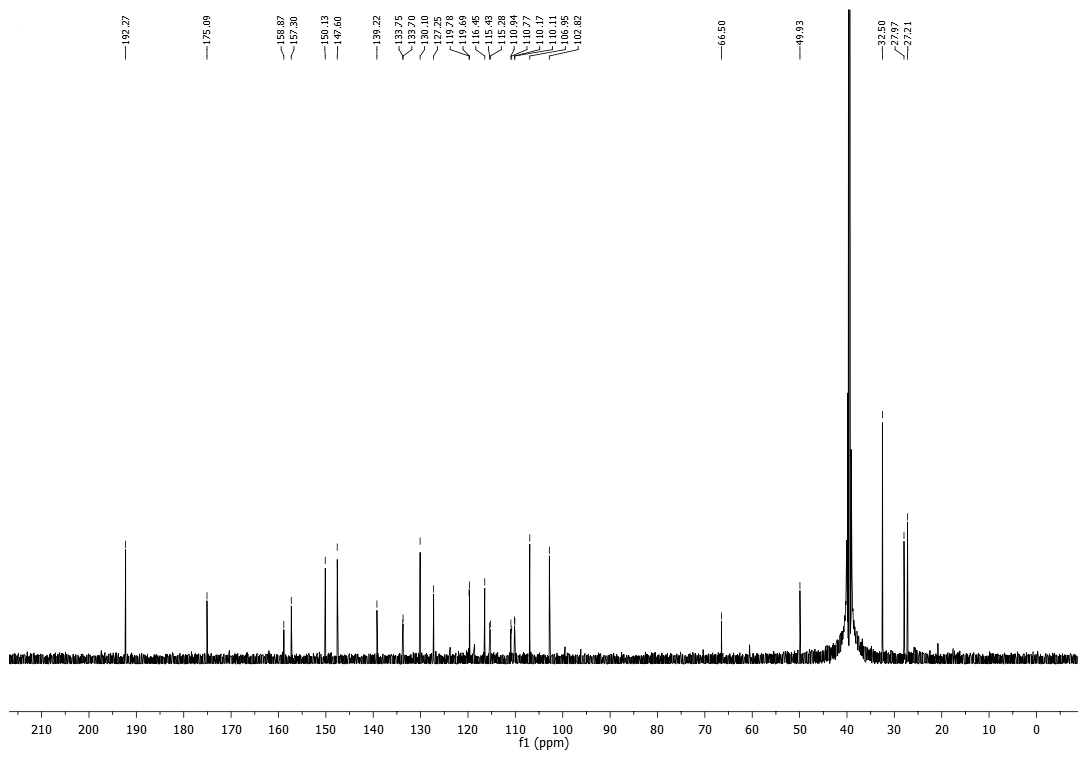


1H NMR and 13C NMR of compound (**5e**)


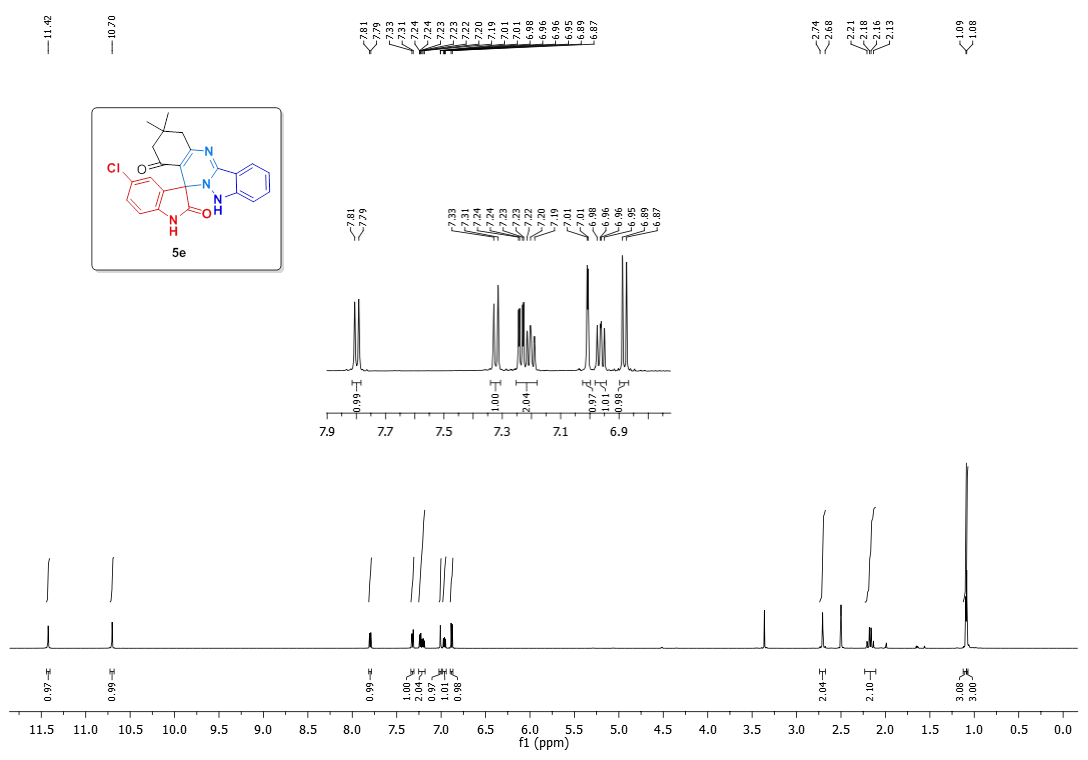

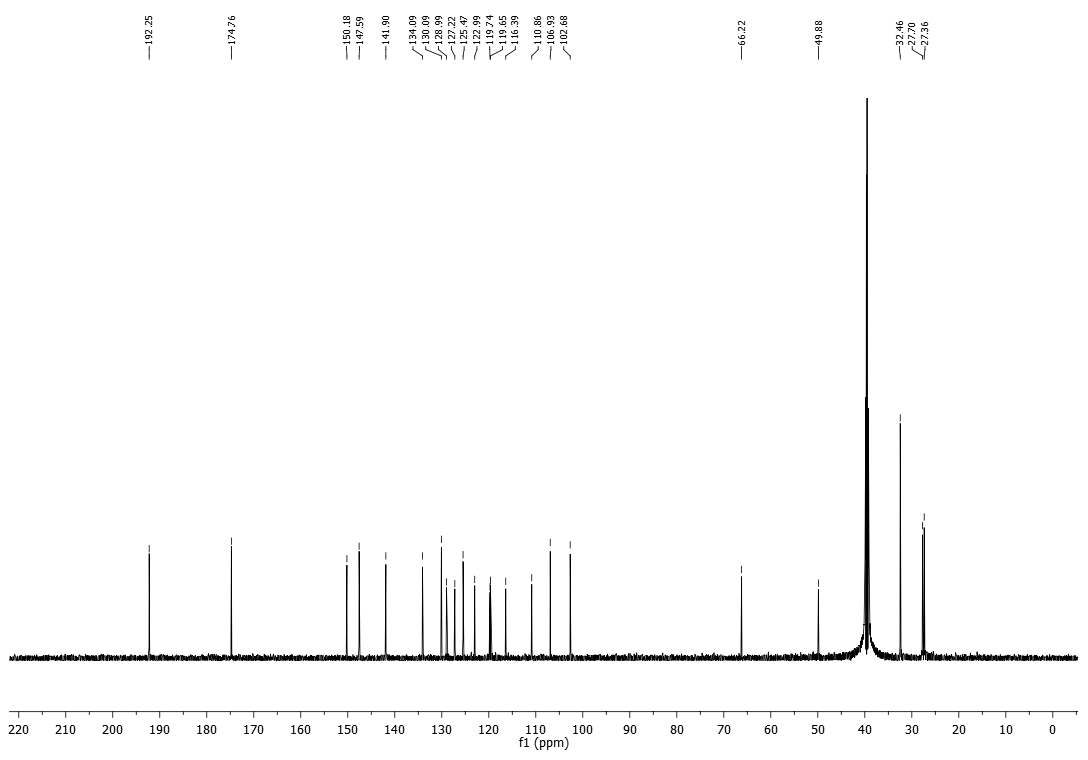


1H NMR and 13C NMR of compound (**5f**)


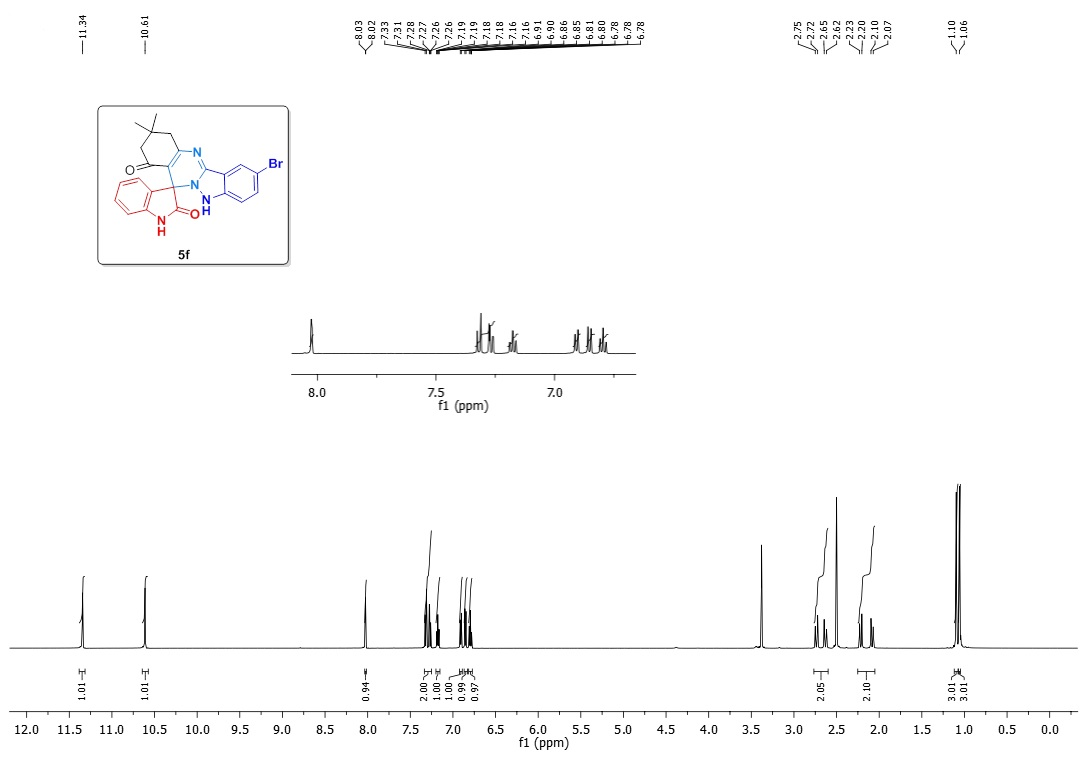

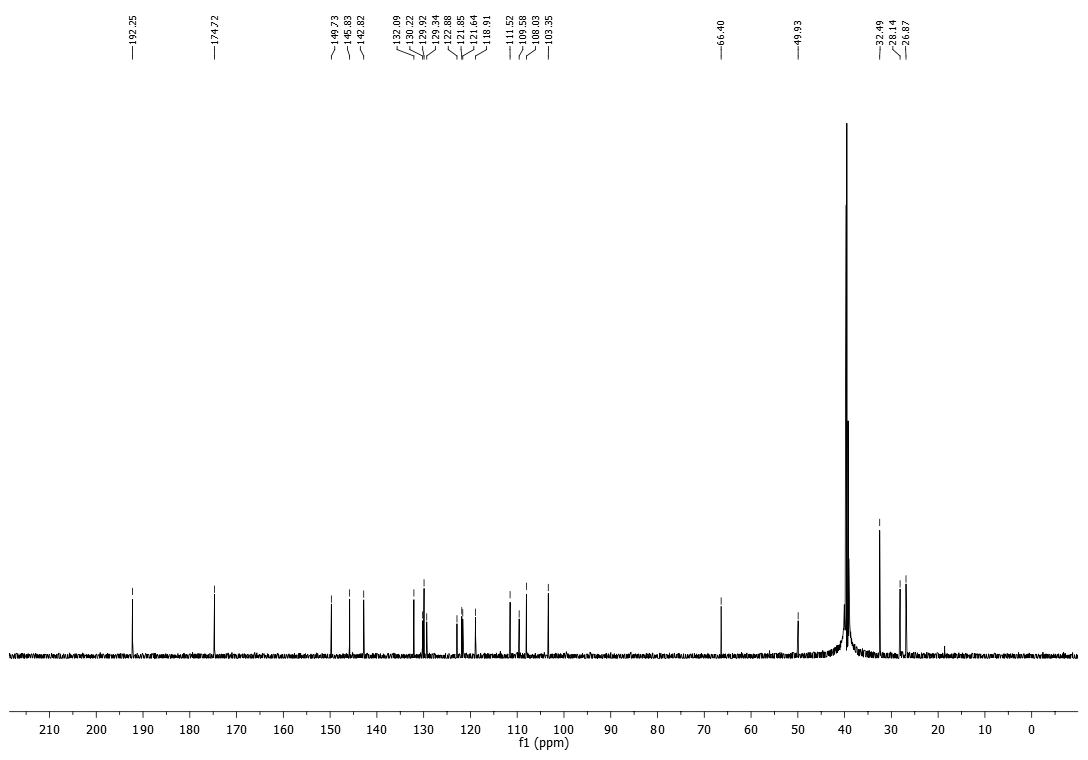


1H NMR and 13C NMR of compound (**5g**)

**
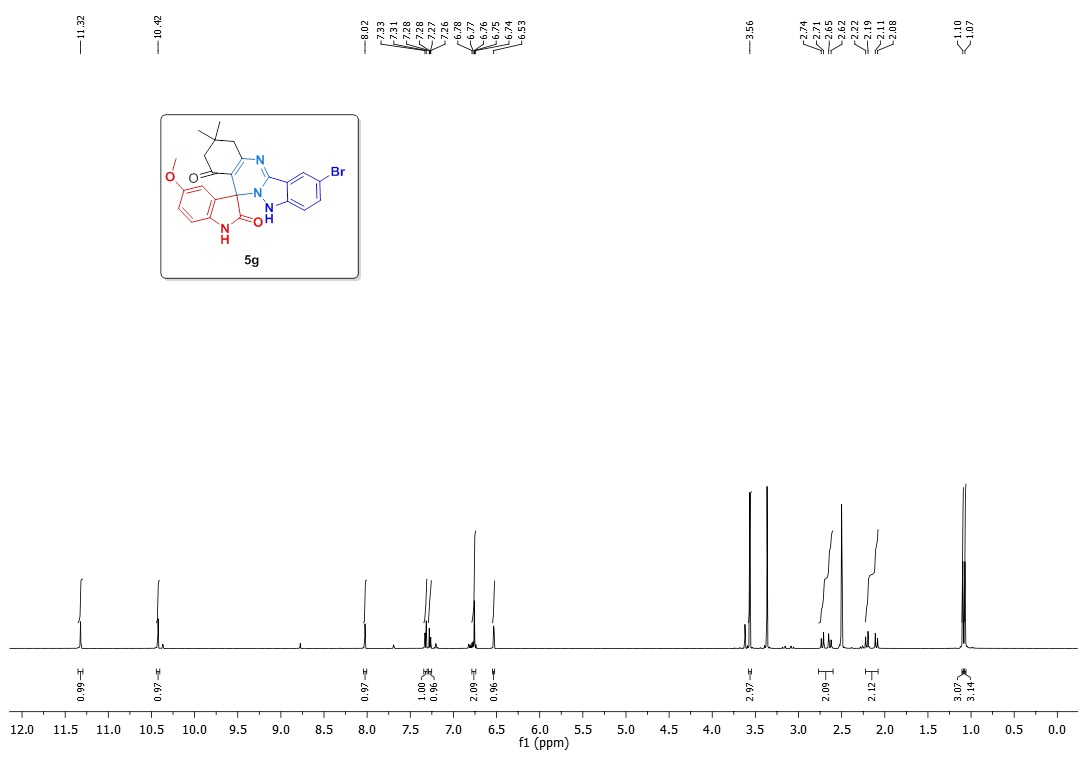

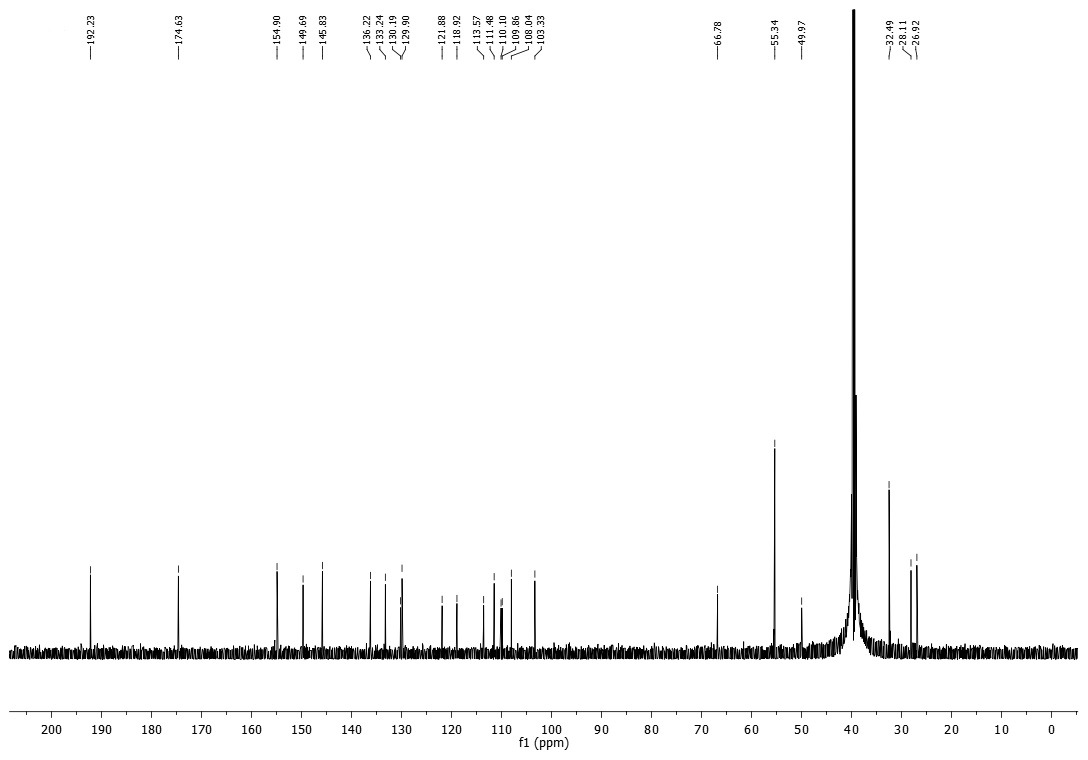
**

1H NMR and 13C NMR of compound (**4h**)


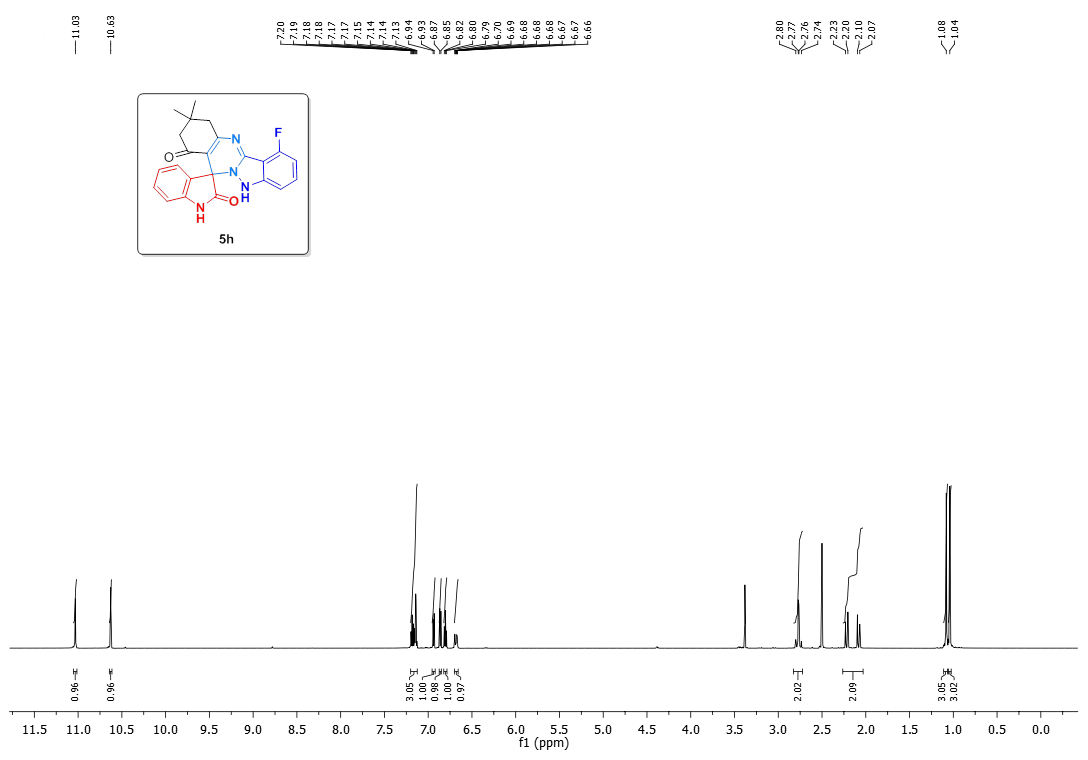

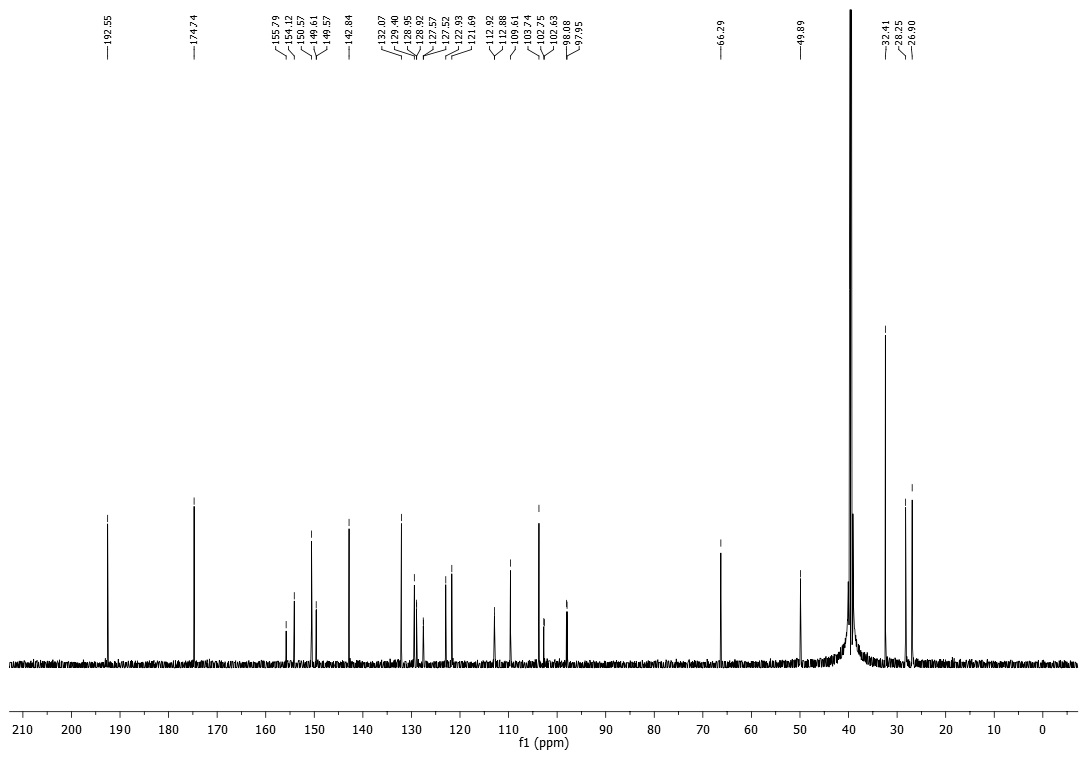


1H NMR and 13C NMR of compound (**5i**)


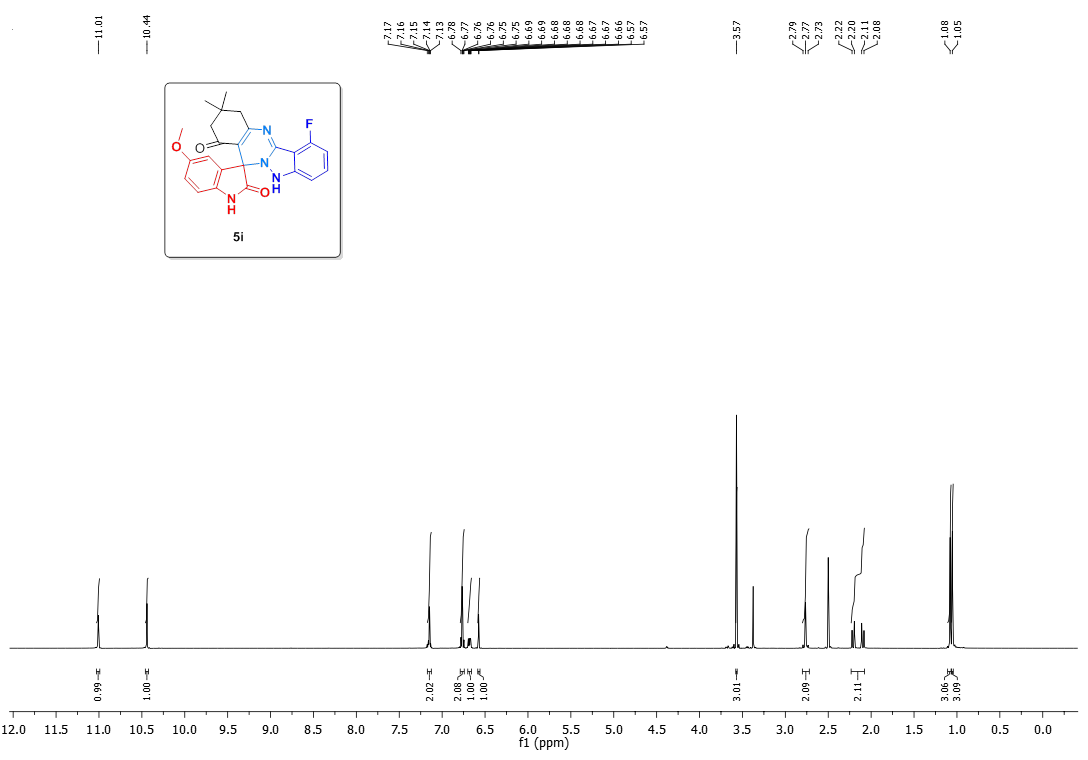

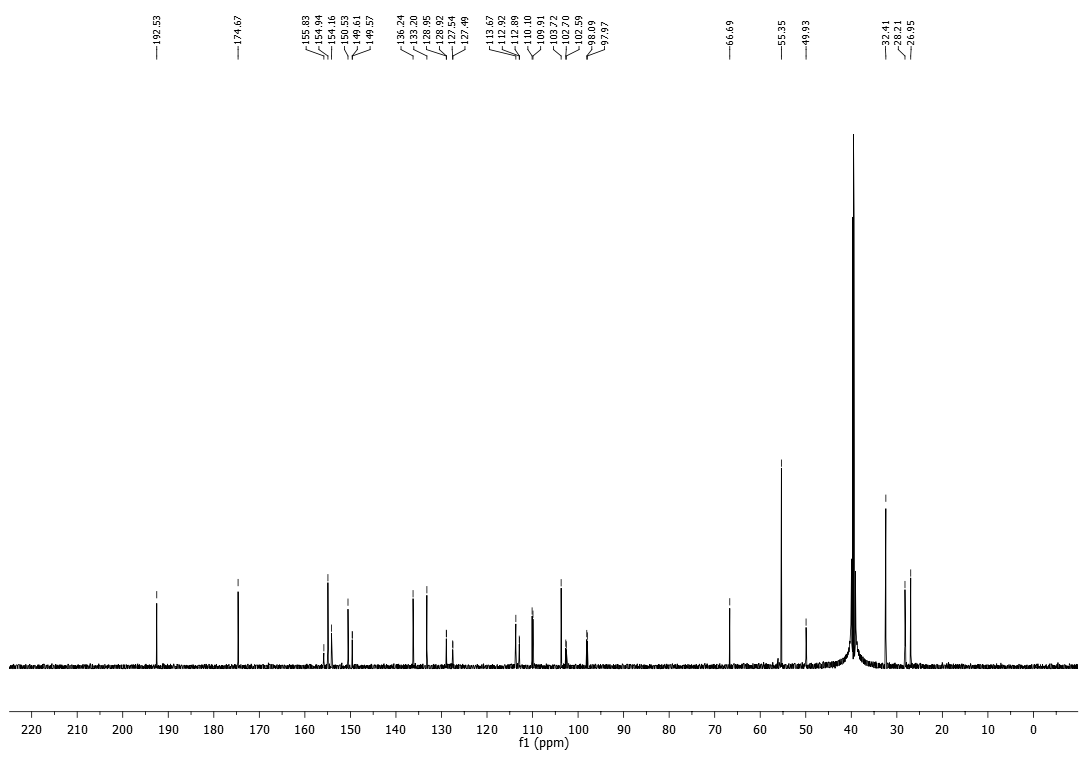


1H NMR and 13C NMR of compound (**5j**)


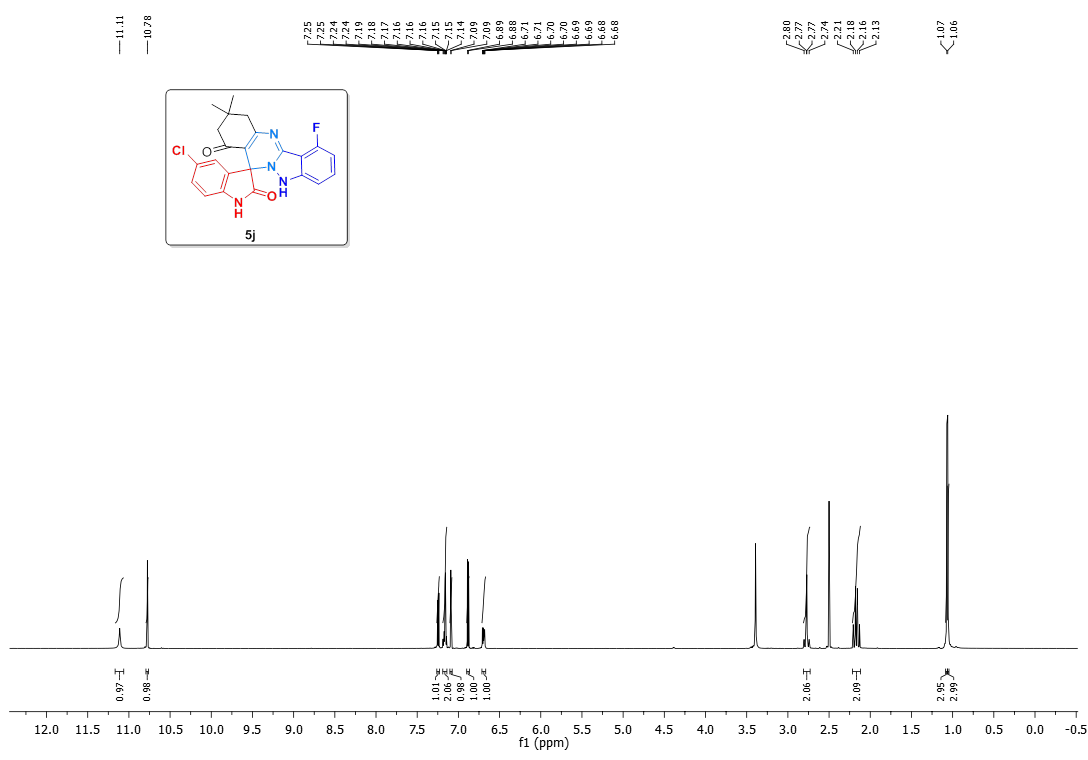

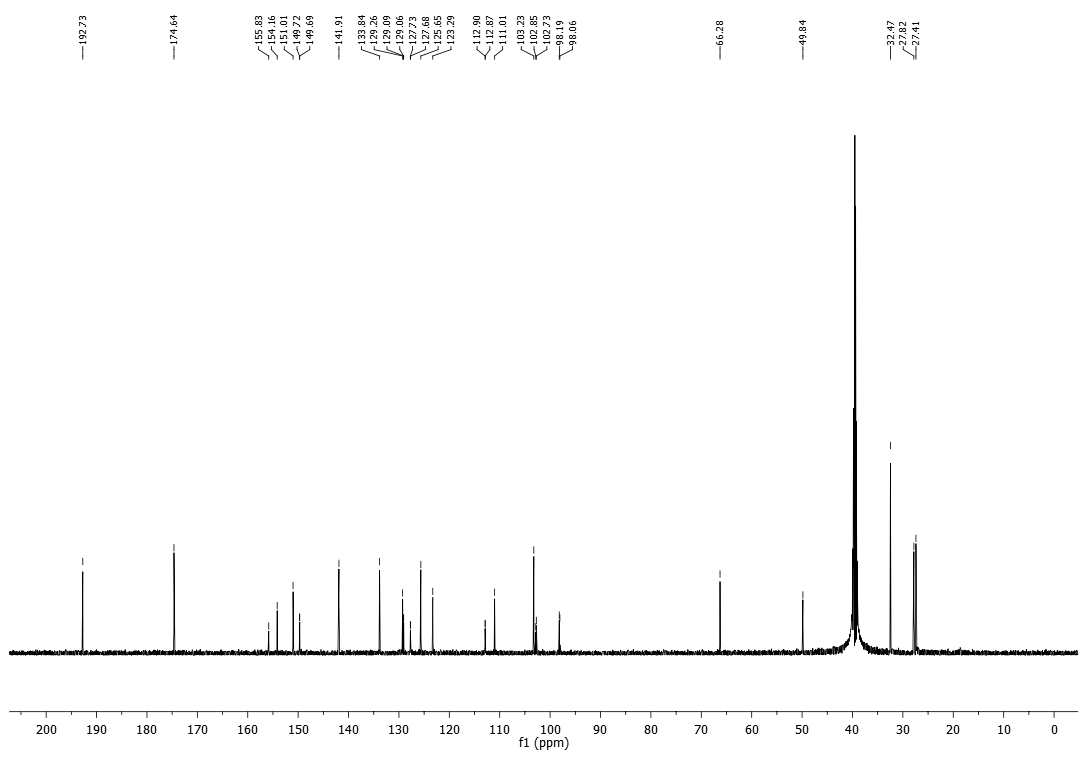


1H NMR and 13C NMR of compound (**5k**)


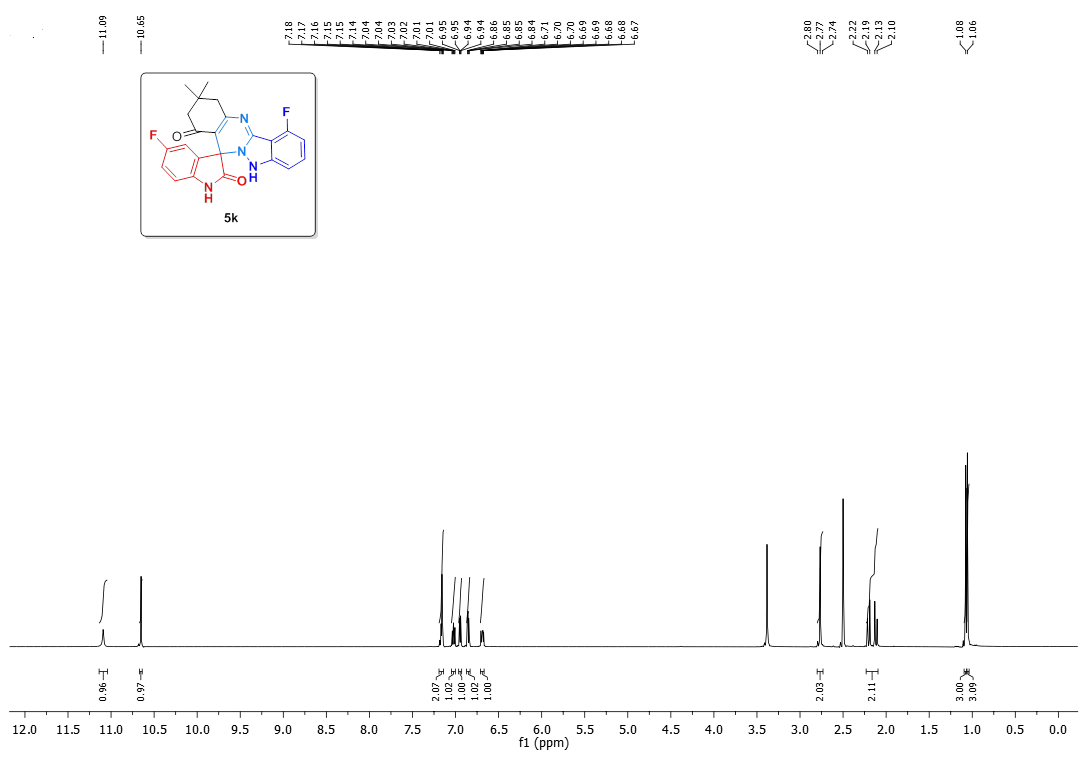

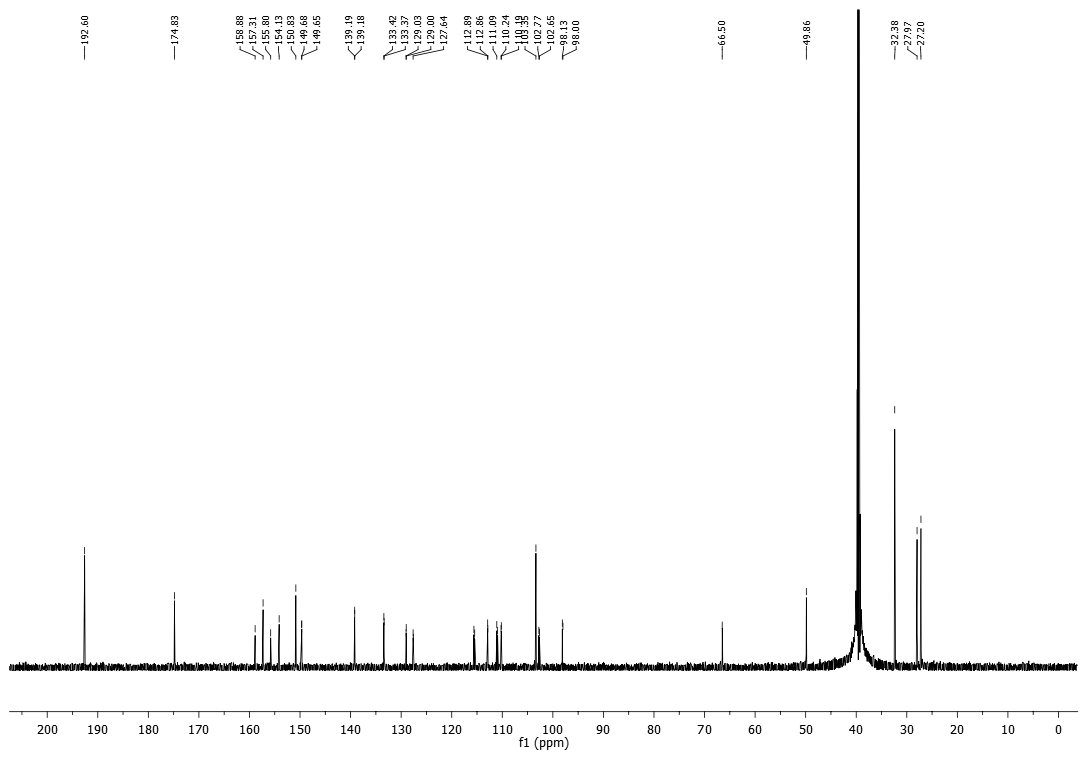


1H NMR and 13C NMR of compound (**5l**)


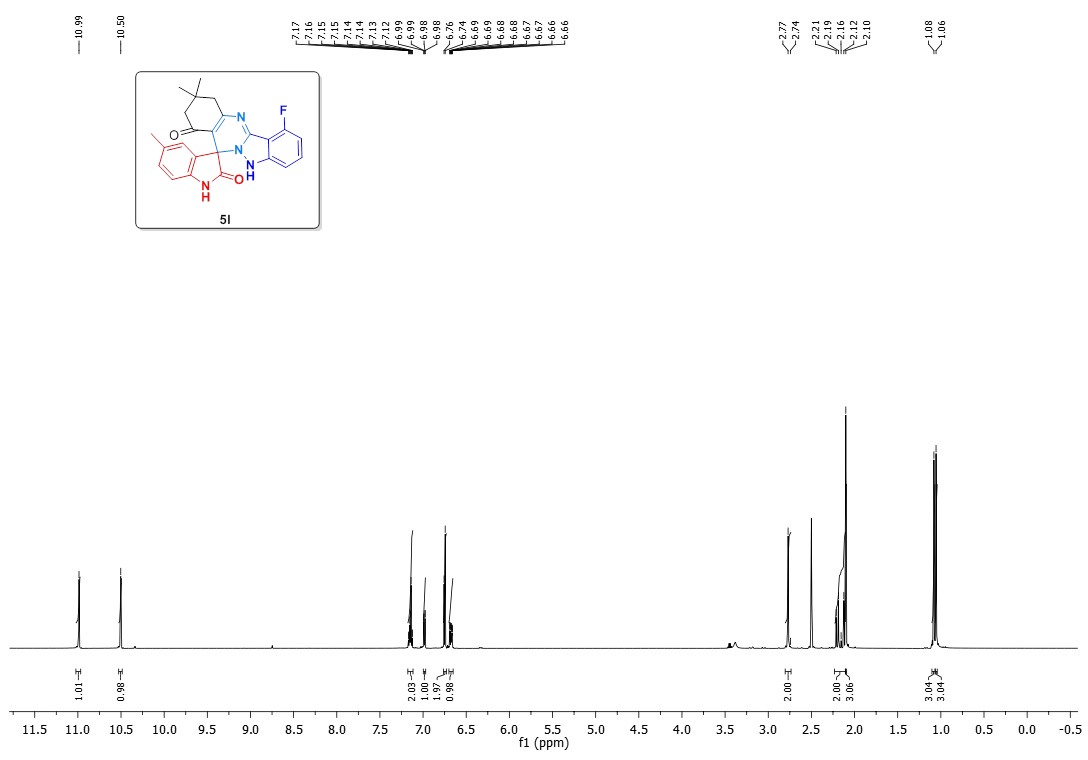

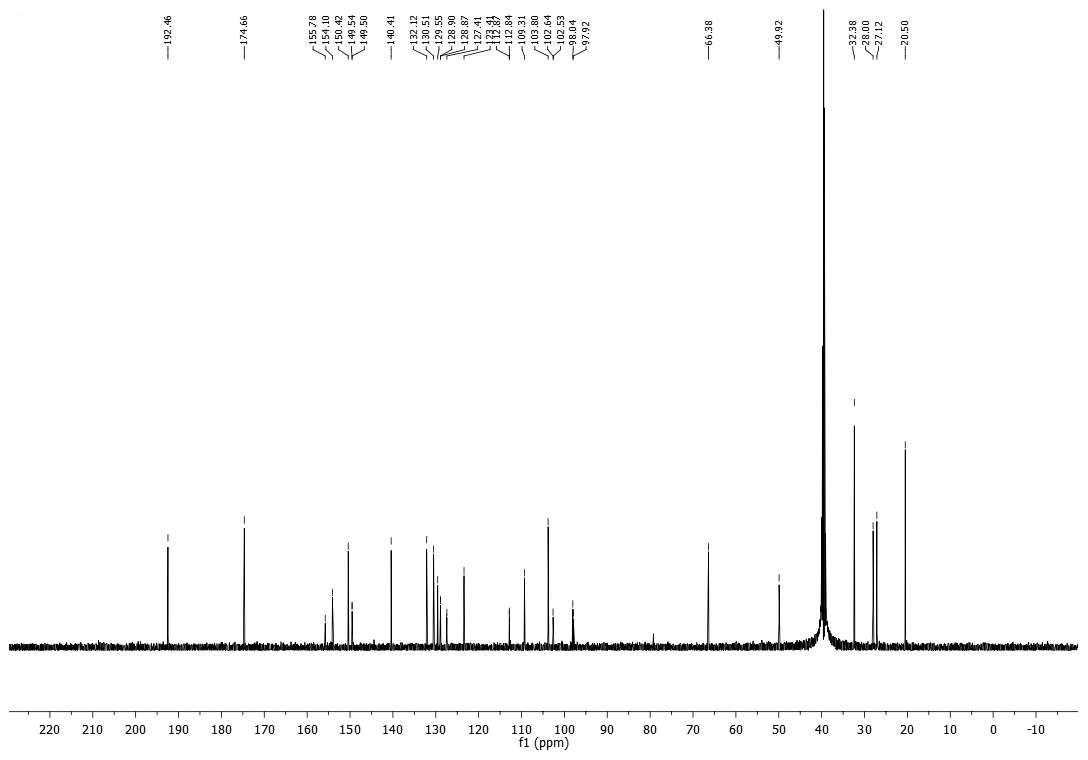


1H NMR and 13C NMR of compound (**5m**)


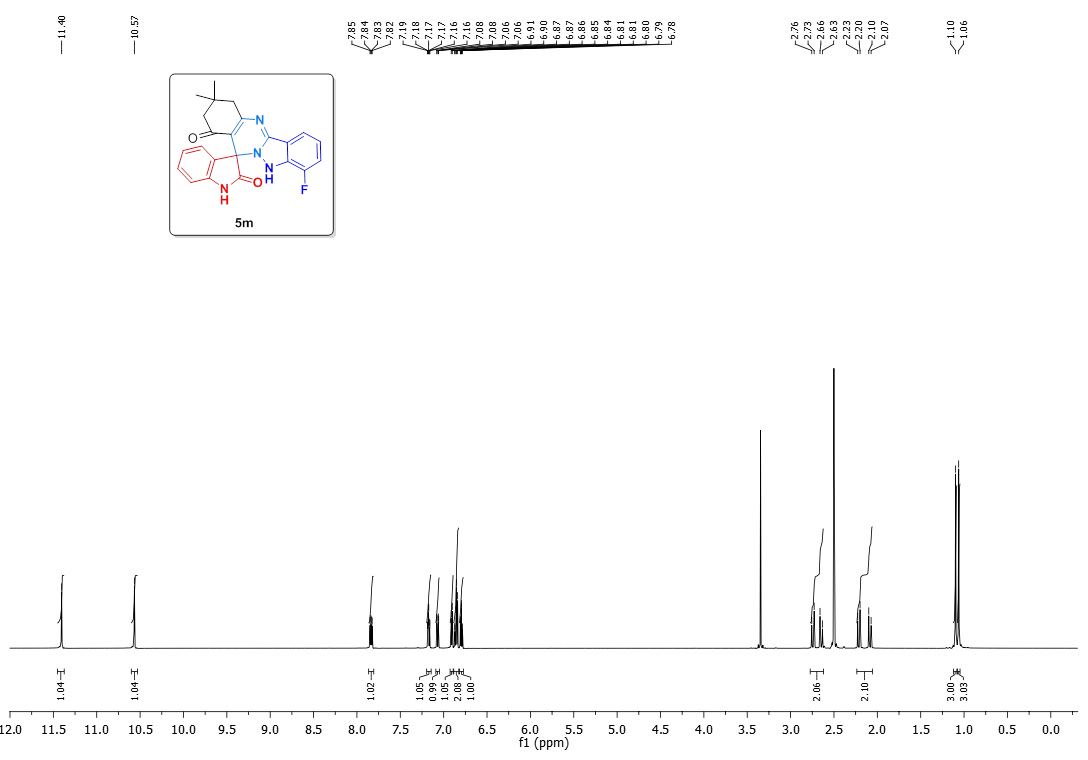

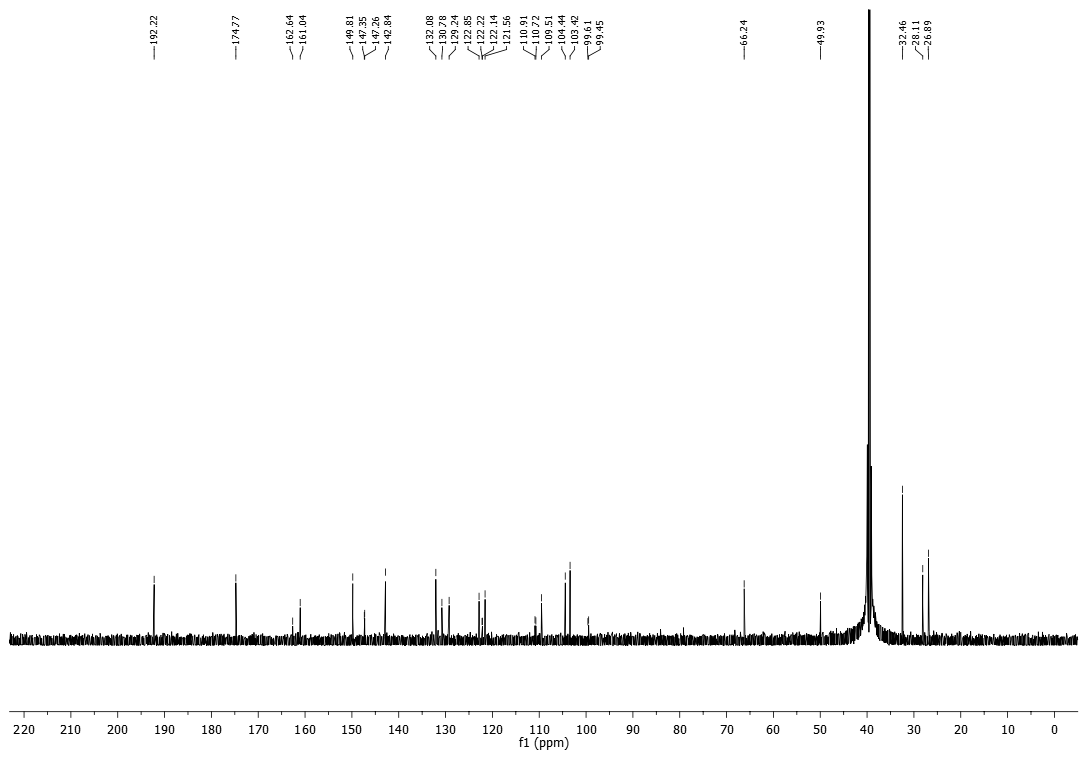


1H NMR and 13C NMR of compound (**5n**)


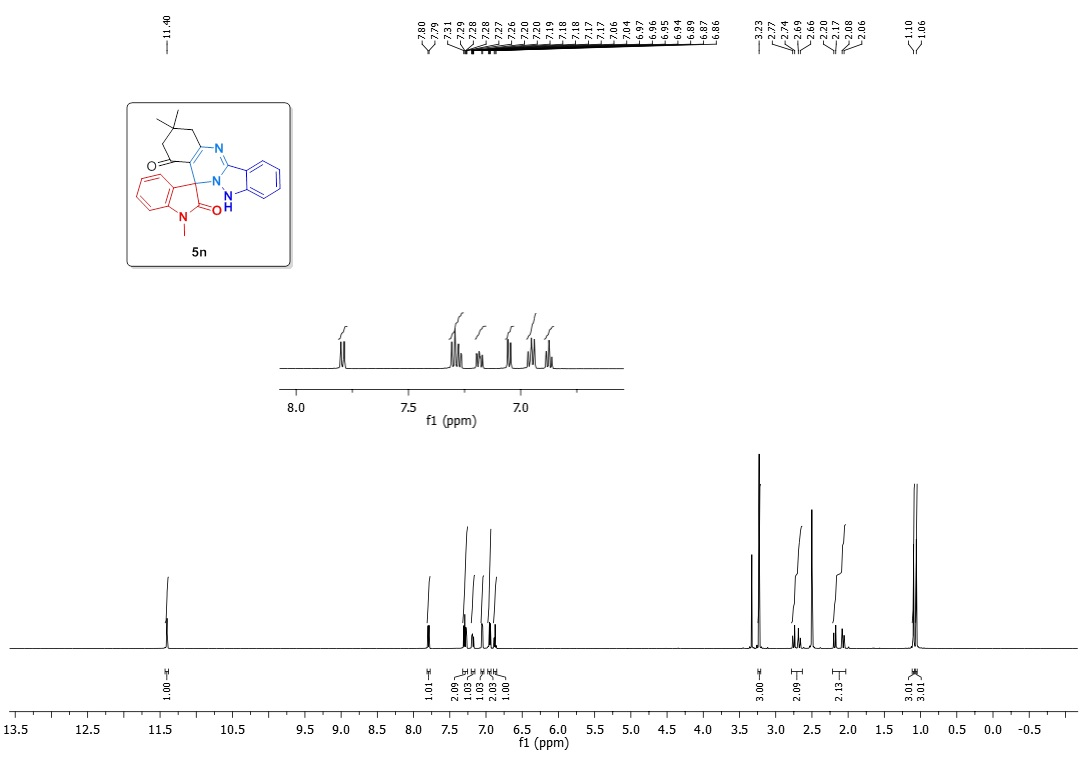

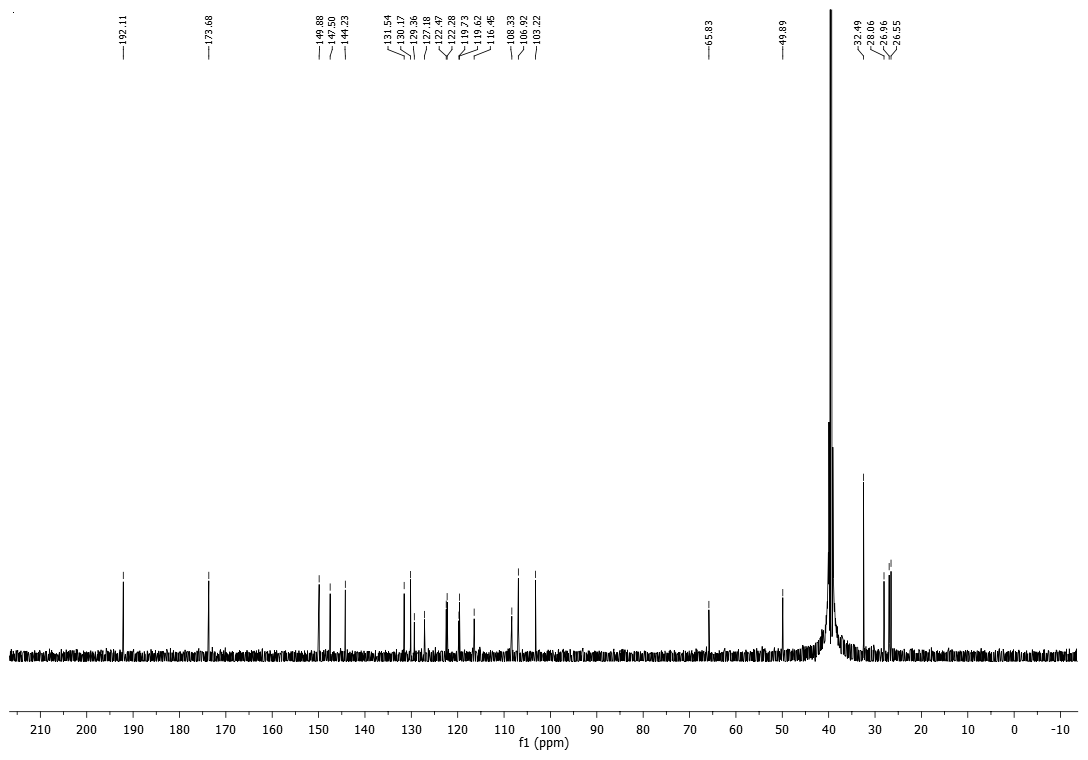


1H NMR and 13C NMR of compound (**5o**)


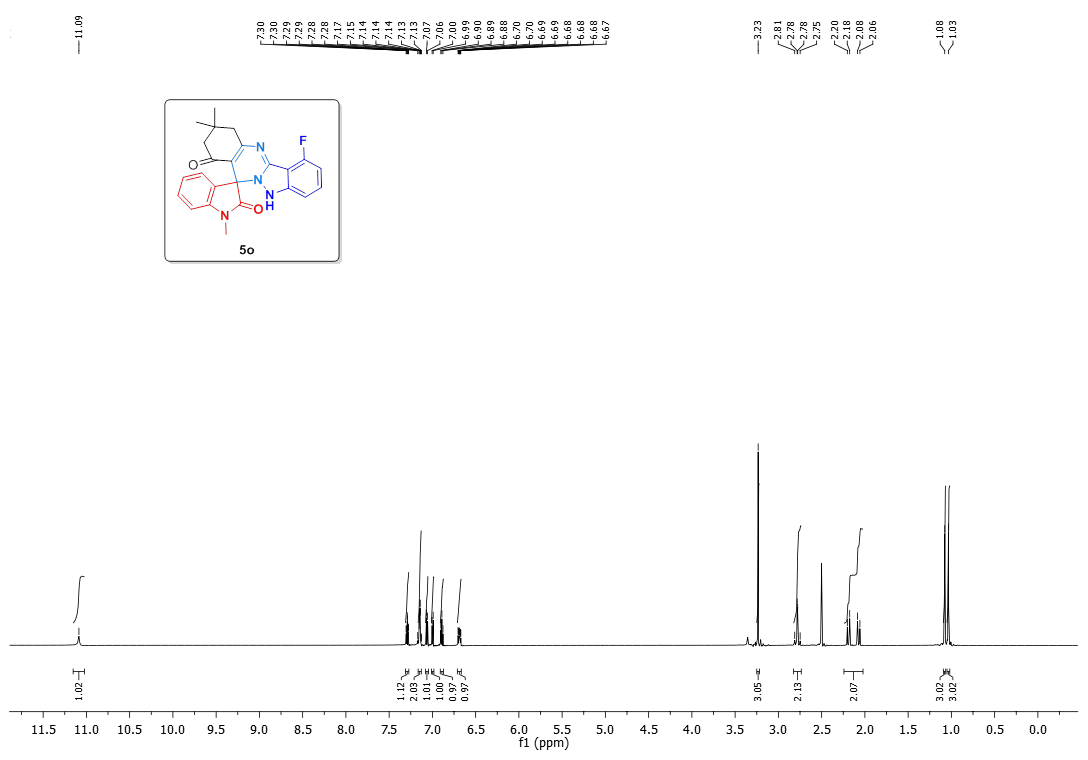

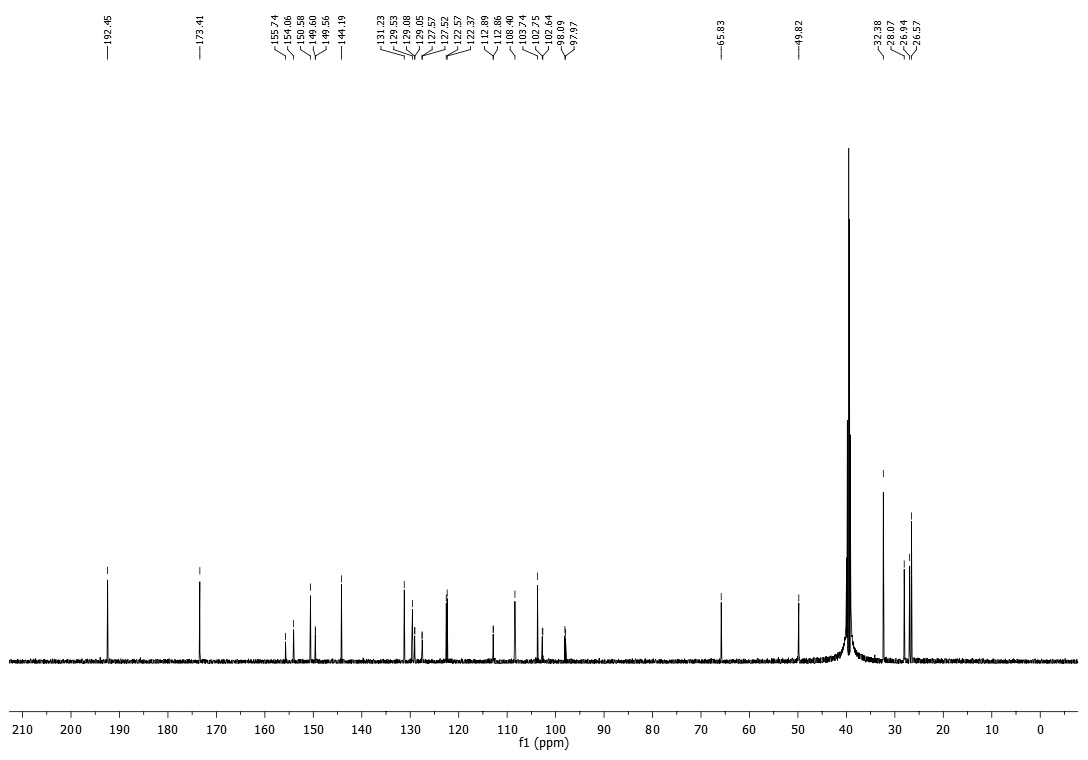


1H NMR and 13C NMR of compound (**5p**)


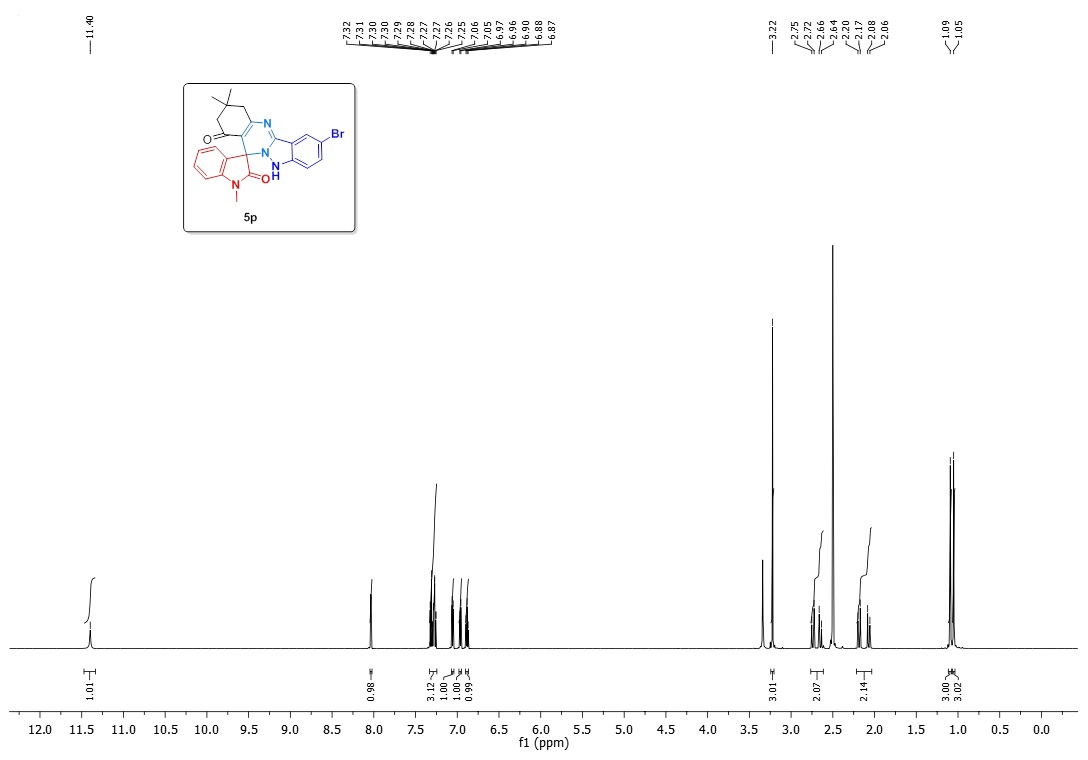

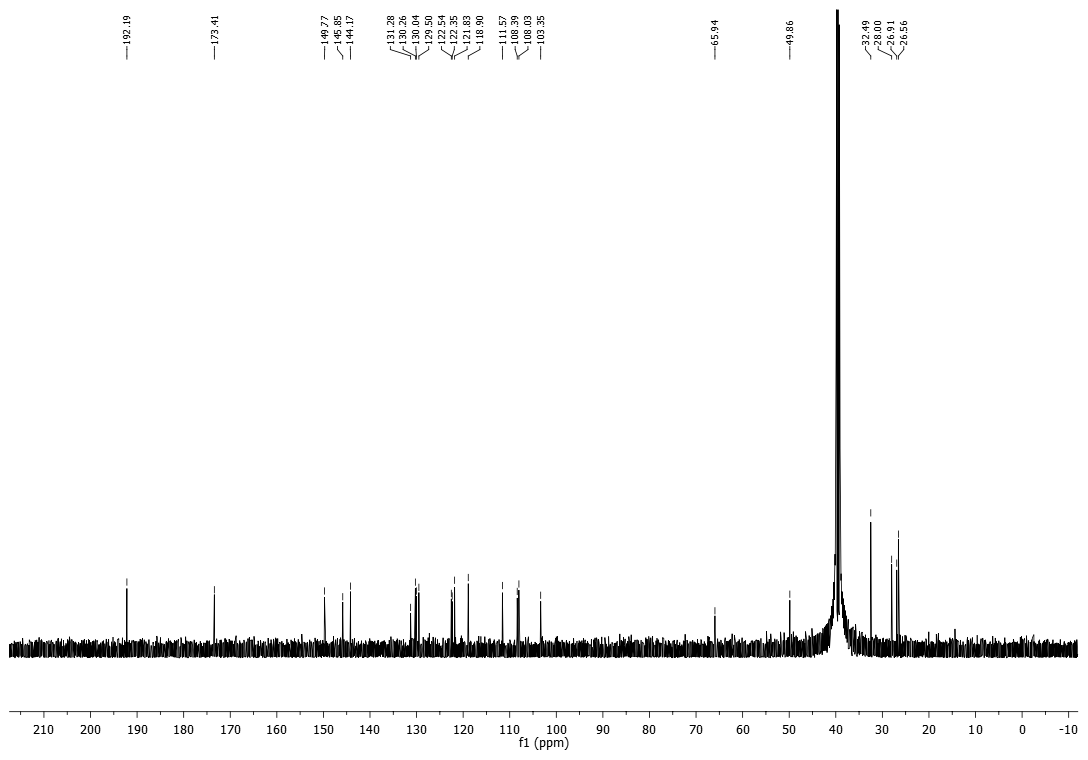


1H NMR and 13C NMR of compound (**5q**)


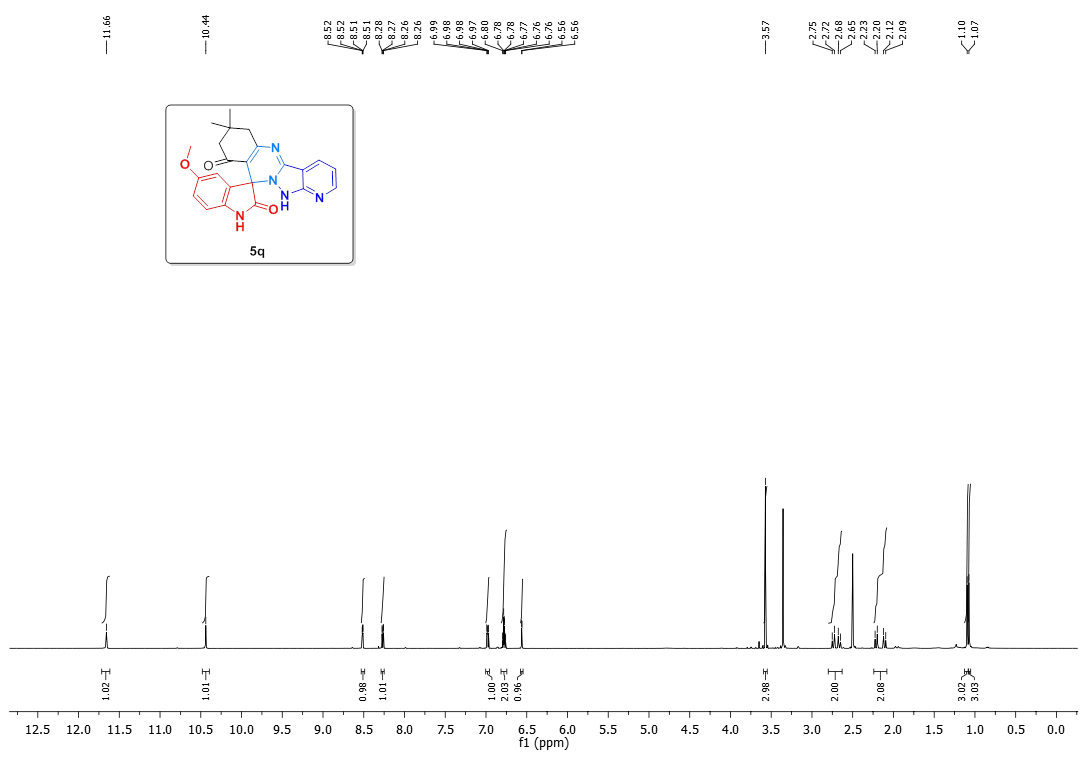

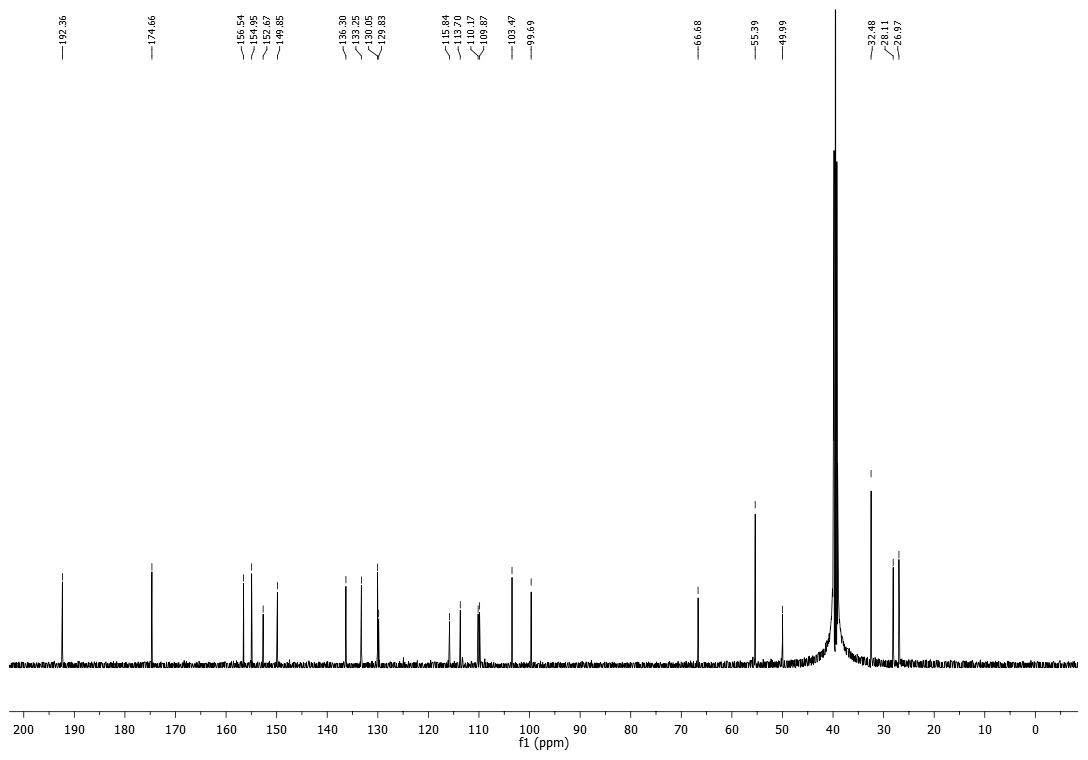


1H NMR and 13C NMR of compound (**5r**)


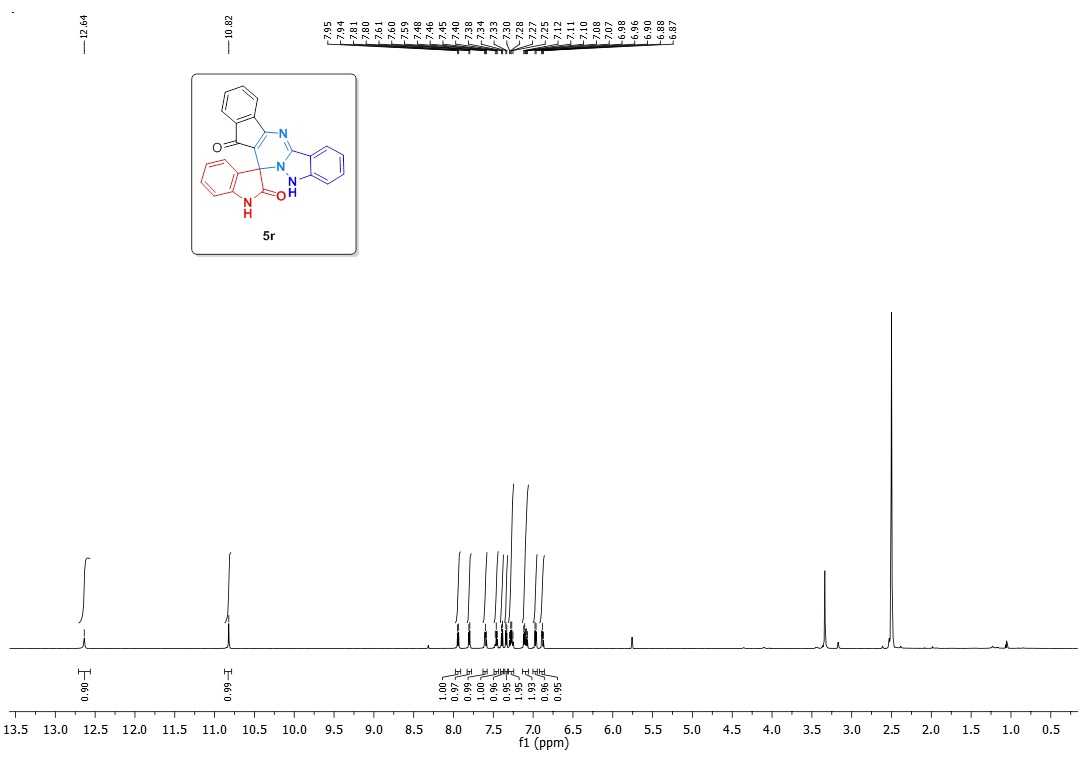

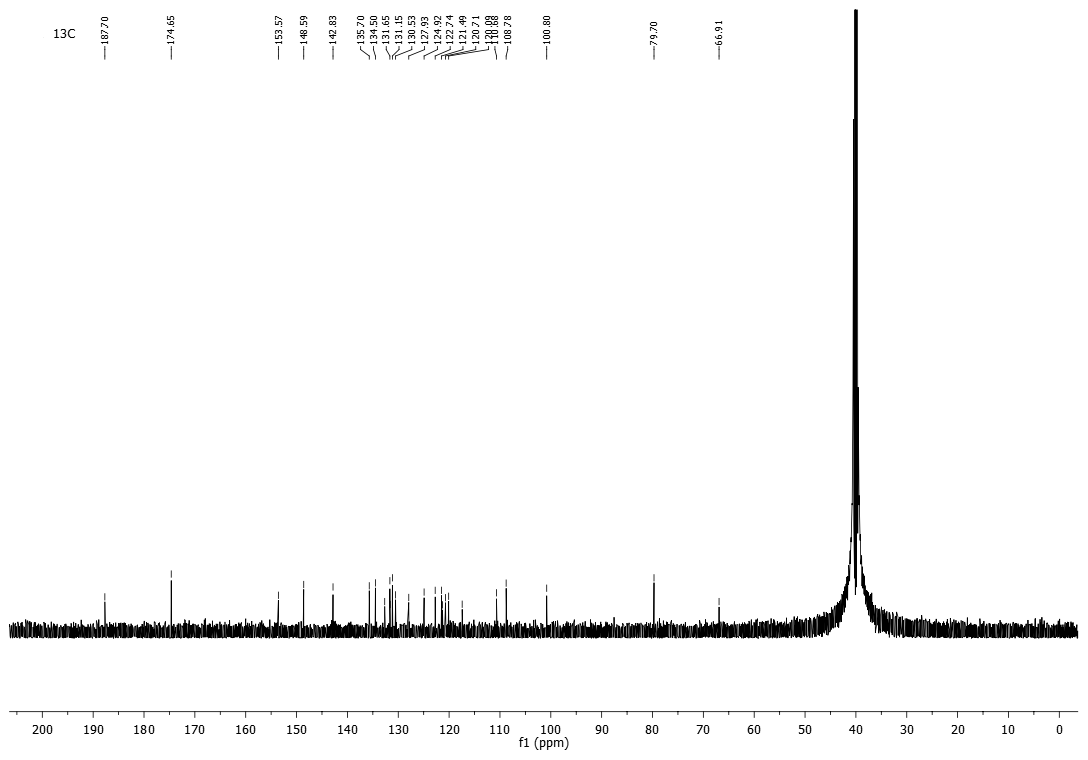

Supplement: Supplementary file 1 [file 14209304]
